# Supplementary material for: A multiple-step in silico screening protocol to identify allosteric inhibitors of Spike–hACE2 binding
Source: Royal Society of Chemistry journal article supplement (doi:10.1039/d1cp04736a), 2022-01-01
Supplement: d1cp04736a1.xlsx [file d1cp04736a1.xlsx]

## Sheet: Summarized docking score
Cluster1	Docking score		Cluster2	Docking score		Cluster3	Docking score		Cluster4	Docking score		Cluster5	Docking score		Cluster6	Docking score		Cluster7	Docking score
ZINC72400628	-7.94		ZINC95347907	-6.796		ZINC71774753	-6.907		ZINC16929987	-7.66		ZINC70680696	-7.518		ZINC04533589	-7.185		ZINC38545654	-7.287
ZINC08101193	-7.928		ZINC05157064	-6.022		ZINC08214514	-5.767		ZINC05390390	-7.536		ZINC91841828	-7.298		ZINC34604490	-6.755		ZINC00156653	-6.439
ZINC13523533	-7.72		ZINC14592918	-5.936		ZINC34073590	-5.733		ZINC00057195	-7.484		ZINC04670170	-7.084		ZINC01704343	-6.738		ZINC19898285	-6.418
ZINC15721403	-7.7		ZINC05104196	-5.701		ZINC39348469	-5.345		ZINC45076911	-7.364		ZINC91842327	-6.974		ZINC16929987	-6.727		ZINC01566179	-6.365
ZINC53683977	-7.683		ZINC34925456	-5.679		ZINC18456289	-5.314		ZINC71769558	-7.3		ZINC91838815	-6.865		ZINC04340289	-6.718		ZINC72400631	-6.345
ZINC35565222	-7.552		ZINC12358606	-5.663		ZINC04517559	-5.286		ZINC77311599	-7.238		ZINC01709948	-6.862		ZINC00337612	-6.712		ZINC03775177	-6.327
ZINC92190929	-7.521		ZINC00895297	-5.662		ZINC04716342	-5.243		ZINC78175059	-7.203		ZINC17175238	-6.85		ZINC00386542	-6.699		ZINC01605381	-6.311
ZINC13523524	-7.491		ZINC04862947	-5.617		ZINC03051366	-5.179		ZINC03869839	-7.198		ZINC00895180	-6.727		ZINC02522481	-6.608		ZINC00334835	-6.31
ZINC65748053	-7.413		ZINC02556454	-5.574		ZINC94609655	-5.173		ZINC02561031	-7.196		ZINC91839887	-6.695		ZINC03830990	-6.597		ZINC00026019	-6.309
ZINC33932938	-7.319		ZINC18682834	-5.566		ZINC93967805	-5.074		ZINC02526389	-7.173		ZINC19075665	-6.678		ZINC03843493	-6.572		ZINC01608473	-6.304
ZINC25492647	-7.306		ZINC18068666	-5.564		ZINC86684170	-5.068		ZINC14418231	-7.157		ZINC64038022	-6.607		ZINC00330106	-6.567		ZINC00165587	-6.16
ZINC21981288	-7.301		ZINC71789996	-5.532		ZINC34925456	-5.061		ZINC14982898	-7.139		ZINC91327159	-6.585		ZINC12504456	-6.566		ZINC00967329	-6.159
ZINC59846620	-7.252		ZINC13339552	-5.518		ZINC93967813	-5.04		ZINC27646500	-7.13		ZINC83261768	-6.564		ZINC01672950	-6.55		ZINC00388552	-6.126
ZINC34802523	-7.233		ZINC02508267	-5.49		ZINC00182954	-4.983		ZINC65748602	-7.088		ZINC76945726	-6.547		ZINC37451493	-6.525		ZINC72400628	-6.116
ZINC04533589	-7.221		ZINC02004611	-5.489		ZINC08034818	-4.963		ZINC15721403	-7.064		ZINC00403345	-6.507		ZINC01669730	-6.521		ZINC17021331	-6.044
ZINC77311604	-7.215		ZINC08214617	-5.489		ZINC04278207	-4.959		ZINC80443488	-7.061		ZINC05134618	-6.485		ZINC04321916	-6.462		ZINC39064693	-6.033
ZINC32602954	-7.211		ZINC01530357	-5.474		ZINC15014792	-4.958		ZINC68575393	-7.057		ZINC00895230	-6.464		ZINC00189722	-6.449		ZINC00057058	-6.021
ZINC60181769	-7.21		ZINC00390965	-5.47		ZINC01685955	-4.923		ZINC01728129	-7.041		ZINC01671491	-6.446		ZINC83293983	-6.427		ZINC65742985	-6.004
ZINC04899711	-7.206		ZINC03870514	-5.466		ZINC04276923	-4.886		ZINC13354222	-7.024		ZINC00003950	-6.441		ZINC83290876	-6.422		ZINC00901888	-6.002
ZINC53314424	-7.171		ZINC04880181	-5.454		ZINC00269420	-4.883		ZINC18043251	-7.007		ZINC17027370	-6.422		ZINC04096103	-6.412		ZINC00000558	-5.989
ZINC58184800	-7.145		ZINC26575646	-5.42		ZINC77292956	-4.86		ZINC00001695	-7.004		ZINC28463692	-6.415		ZINC00389863	-6.406		ZINC00388292	-5.985
ZINC77311601	-7.14		ZINC00391200	-5.414		ZINC18044545	-4.834		ZINC22066935	-6.998		ZINC05960556	-6.403		ZINC13507418	-6.4		ZINC02566153	-5.982
ZINC45953674	-7.139		ZINC13513047	-5.398		ZINC77292958	-4.813		ZINC27646510	-6.996		ZINC00388635	-6.386		ZINC00153908	-6.396		ZINC00402496	-5.963
ZINC04899717	-7.097		ZINC01576782	-5.358		ZINC77312693	-4.802		ZINC04240327	-6.984		ZINC04533589	-6.38		ZINC04554508	-6.393		ZINC82594735	-5.961
ZINC77311599	-7.093		ZINC05133268	-5.332		ZINC02525582	-4.774		ZINC77301924	-6.972		ZINC37461416	-6.378		ZINC00180094	-6.381		ZINC05669671	-5.937
ZINC36978331	-7.088		ZINC01529317	-5.332		ZINC61957885	-4.765		ZINC14982901	-6.962		ZINC04543940	-6.317		ZINC05944694	-6.378		ZINC01683632	-5.934
ZINC04096261	-7.082		ZINC01081272	-5.33		ZINC13531118	-4.758		ZINC06585367	-6.946		ZINC38545471	-6.298		ZINC36056875	-6.377		ZINC00403567	-5.933
ZINC02560929	-7.067		ZINC04801871	-5.323		ZINC03860799	-4.756		ZINC77274528	-6.935		ZINC03581021	-6.298		ZINC02048685	-6.372		ZINC00058126	-5.933
ZINC56870823	-7.066		ZINC04658561	-5.317		ZINC06094022	-4.715		ZINC04188112	-6.927		ZINC12405009	-6.298		ZINC20768469	-6.359		ZINC00119283	-5.923
ZINC04762658	-7.056		ZINC00336881	-5.313		ZINC00114121	-4.712		ZINC00389778	-6.924		ZINC00053379	-6.291		ZINC19878092	-6.358		ZINC25492647	-5.899
ZINC33986000	-7.045		ZINC02839277	-5.312		ZINC16401377	-4.691		ZINC00409269	-6.912		ZINC21981355	-6.283		ZINC35148471	-6.356		ZINC00404794	-5.899
ZINC04533532	-7.038		ZINC12417093	-5.304		ZINC04822915	-4.683		ZINC02510814	-6.873		ZINC39113558	-6.283		ZINC03833811	-6.353		ZINC76945729	-5.895
ZINC71774819	-7.027		ZINC01558055	-5.278		ZINC02378778	-4.661		ZINC00119283	-6.872		ZINC04557361	-6.274		ZINC49171228	-6.332		ZINC16952677	-5.886
ZINC12502557	-6.997		ZINC06660936	-5.264		ZINC27622716	-4.635		ZINC00057256	-6.871		ZINC12410292	-6.274		ZINC11889380	-6.323		ZINC77311599	-5.881
ZINC77274528	-6.993		ZINC00895074	-5.234		ZINC16401373	-4.635		ZINC04762665	-6.869		ZINC00331671	-6.269		ZINC00161958	-6.319		ZINC91358691	-5.877
ZINC32788203	-6.991		ZINC25628437	-5.234		ZINC38644404	-4.626		ZINC00119286	-6.864		ZINC24227107	-6.266		ZINC00020440	-6.312		ZINC00161726	-5.868
ZINC64634197	-6.99		ZINC34566495	-5.224		ZINC43352750	-4.607		ZINC01678601	-6.857		ZINC43772215	-6.256		ZINC19735109	-6.311		ZINC37869983	-5.867
ZINC02516170	-6.986		ZINC04096088	-5.211		ZINC19415200	-4.586		ZINC05337352	-6.849		ZINC02026644	-6.256		ZINC03805072	-6.304		ZINC03833811	-5.858
ZINC15721824	-6.981		ZINC04762328	-5.182		ZINC13413559	-4.576		ZINC40538242	-6.848		ZINC00073711	-6.251		ZINC16952513	-6.302		ZINC44699594	-5.854
ZINC00069939	-6.977		ZINC71782699	-5.176		ZINC19415202	-4.568		ZINC15206126	-6.846		ZINC13679482	-6.243		ZINC01611434	-6.27		ZINC00388086	-5.85
ZINC04899714	-6.977		ZINC44225877	-5.172		ZINC01036884	-4.545		ZINC17376088	-6.842		ZINC13517144	-6.242		ZINC37388516	-6.269		ZINC00018079	-5.849
ZINC00517578	-6.96		ZINC03598262	-5.166		ZINC00394975	-4.543		ZINC03788703	-6.83		ZINC05031333	-6.237		ZINC04353345	-6.265		ZINC02583736	-5.847
ZINC65748051	-6.95		ZINC00404806	-5.165		ZINC32099647	-4.535		ZINC03869310	-6.826		ZINC07995781	-6.236		ZINC16400945	-6.26		ZINC00058111	-5.841
ZINC00279622	-6.937		ZINC19419008	-5.159		ZINC01693430	-4.505		ZINC28247600	-6.824		ZINC16951960	-6.234		ZINC33975256	-6.257		ZINC13759807	-5.841
ZINC72332893	-6.937		ZINC39058040	-5.158		ZINC04658588	-4.481		ZINC08830755	-6.819		ZINC00341465	-6.221		ZINC01861052	-6.253		ZINC86396615	-5.84
ZINC03872997	-6.934		ZINC00895030	-5.157		ZINC39348468	-4.478		ZINC03201878	-6.817		ZINC00010512	-6.219		ZINC16955291	-6.253		ZINC76945726	-5.837
ZINC01530357	-6.918		ZINC44225133	-5.148		ZINC01760657	-4.465		ZINC00404254	-6.816		ZINC04801871	-6.213		ZINC00402816	-6.249		ZINC26444351	-5.835
ZINC13523529	-6.9		ZINC05224771	-5.148		ZINC00265614	-4.444		ZINC71789792	-6.809		ZINC37461417	-6.209		ZINC00298681	-6.248		ZINC00001322	-5.828
ZINC05387427	-6.892		ZINC00895296	-5.139		ZINC93228826	-4.436		ZINC02516303	-6.808		ZINC04556984	-6.203		ZINC33648485	-6.239		ZINC00163348	-5.827
ZINC13508887	-6.874		ZINC38531907	-5.135		ZINC39348470	-4.421		ZINC14963204	-6.805		ZINC16622222	-6.199		ZINC02014886	-6.237		ZINC08076087	-5.82
ZINC05413017	-6.863		ZINC01529520	-5.122		ZINC94064761	-4.416		ZINC35024890	-6.802		ZINC12417093	-6.198		ZINC01625751	-6.235		ZINC53274750	-5.819
ZINC06092950	-6.848		ZINC01420532	-5.118		ZINC15206163	-4.408		ZINC03783111	-6.802		ZINC03830624	-6.197		ZINC03956771	-6.233		ZINC01678600	-5.816
ZINC08076666	-6.848		ZINC01616555	-5.118		ZINC04316395	-4.384		ZINC86931664	-6.796		ZINC05189877	-6.184		ZINC00404362	-6.232		ZINC01616555	-5.807
ZINC03953841	-6.845		ZINC00388596	-5.117		ZINC06631999	-4.364		ZINC01678600	-6.793		ZINC58951067	-6.183		ZINC00058062	-6.232		ZINC04533917	-5.804
ZINC29348353	-6.845		ZINC72207296	-5.101		ZINC14956507	-4.344		ZINC12416680	-6.791		ZINC03569663	-6.181		ZINC04916518	-6.222		ZINC03394296	-5.804
ZINC00039524	-6.844		ZINC05019352	-5.095		ZINC84847541	-4.338		ZINC06070245	-6.788		ZINC95347908	-6.18		ZINC71790030	-6.221		ZINC00119286	-5.799
ZINC65748055	-6.843		ZINC00895218	-5.087		ZINC58592281	-4.327		ZINC08101192	-6.787		ZINC13517187	-6.168		ZINC00001793	-6.22		ZINC34343618	-5.797
ZINC45076911	-6.84		ZINC02558026	-5.08		ZINC01586365	-4.319		ZINC05200353	-6.785		ZINC04862948	-6.165		ZINC00402887	-6.217		ZINC13385780	-5.796
ZINC76945726	-6.83		ZINC01641058	-5.058		ZINC01850964	-4.317		ZINC39294072	-6.77		ZINC00390965	-6.164		ZINC77300681	-6.212		ZINC04762808	-5.792
ZINC65748058	-6.828		ZINC00895455	-5.055		ZINC04204322	-4.313		ZINC45076909	-6.763		ZINC05224771	-6.16		ZINC04916522	-6.211		ZINC03786134	-5.774
ZINC83302792	-6.824		ZINC22067422	-5.032		ZINC01530605	-4.295		ZINC02560939	-6.761		ZINC38949034	-6.159		ZINC00039178	-6.206		ZINC05133378	-5.769
ZINC62233494	-6.821		ZINC39120610	-5.023		ZINC08214617	-4.28		ZINC01614158	-6.754		ZINC16642540	-6.158		ZINC32627421	-6.206		ZINC86801570	-5.759
ZINC43758959	-6.819		ZINC39258467	-5.02		ZINC04801763	-4.273		ZINC02047673	-6.751		ZINC50991271	-6.15		ZINC00402817	-6.205		ZINC00061038	-5.748
ZINC77274525	-6.816		ZINC00895970	-5.019		ZINC19045367	-4.269		ZINC04576606	-6.748		ZINC02013424	-6.148		ZINC04536049	-6.2		ZINC71789633	-5.742
ZINC33822019	-6.814		ZINC00391199	-5.016		ZINC22060620	-4.225		ZINC13517387	-6.747		ZINC18286010	-6.144		ZINC05093174	-6.2		ZINC05572699	-5.738
ZINC05274104	-6.813		ZINC02516276	-5.013		ZINC02378789	-4.216		ZINC03869309	-6.742		ZINC01708115	-6.139		ZINC28463692	-6.199		ZINC06726974	-5.733
ZINC34165681	-6.803		ZINC00895081	-5.012		ZINC16036055	-4.195		ZINC12502183	-6.742		ZINC00896749	-6.138		ZINC00394833	-6.197		ZINC03795332	-5.73
ZINC15776781	-6.799		ZINC00901647	-5.011		ZINC21982951	-4.191		ZINC00057845	-6.732		ZINC05133268	-6.138		ZINC83290874	-6.197		ZINC86865138	-5.724
ZINC00901647	-6.795		ZINC12437226	-5.005		ZINC05368836	-4.177		ZINC22048043	-6.73		ZINC04556983	-6.138		ZINC00113439	-6.193		ZINC44699596	-5.721
ZINC91364295	-6.791		ZINC00225904	-5.004		ZINC05819733	-4.172		ZINC04916518	-6.729		ZINC01593826	-6.135		ZINC00154538	-6.193		ZINC00391883	-5.718
ZINC16889884	-6.786		ZINC00895984	-5.004		ZINC36379811	-4.167		ZINC83290848	-6.726		ZINC87314354	-6.131		ZINC22647262	-6.191		ZINC17013453	-5.714
ZINC17003373	-6.777		ZINC37461418	-5.002		ZINC08651759	-4.155		ZINC04990799	-6.722		ZINC41272047	-6.13		ZINC19899280	-6.181		ZINC04245667	-5.714
ZINC76945729	-6.753		ZINC95347908	-5.001		ZINC34332852	-4.151		ZINC67665026	-6.72		ZINC13340267	-6.126		ZINC27385535	-6.179		ZINC00401166	-5.712
ZINC71788362	-6.752		ZINC04202474	-4.984		ZINC00895969	-4.132		ZINC00038935	-6.72		ZINC00020253	-6.125		ZINC80052588	-6.177		ZINC08723387	-5.699
ZINC04018122	-6.75		ZINC04759986	-4.975		ZINC01759739	-4.129		ZINC00018079	-6.72		ZINC04762070	-6.123		ZINC08729157	-6.177		ZINC30724307	-5.699
ZINC01643043	-6.748		ZINC44796461	-4.974		ZINC05023935	-4.119		ZINC83290874	-6.713		ZINC25691911	-6.123		ZINC00281855	-6.171		ZINC04165550	-5.697
ZINC06524444	-6.745		ZINC65739775	-4.949		ZINC03995571	-4.119		ZINC04098893	-6.707		ZINC00895296	-6.121		ZINC01618451	-6.168		ZINC03631600	-5.695
ZINC84462581	-6.745		ZINC01530431	-4.949		ZINC38644408	-4.119		ZINC28244200	-6.707		ZINC06091355	-6.117		ZINC04298371	-6.168		ZINC00391601	-5.685
ZINC04899768	-6.745		ZINC70621913	-4.948		ZINC00331715	-4.112		ZINC06119283	-6.705		ZINC01656422	-6.113		ZINC04574701	-6.165		ZINC00330106	-5.674
ZINC02046896	-6.742		ZINC01464311	-4.947		ZINC01662514	-4.111		ZINC00069942	-6.704		ZINC04181835	-6.112		ZINC01605381	-6.162		ZINC01575342	-5.67
ZINC91365980	-6.741		ZINC00167136	-4.932		ZINC00084153	-4.111		ZINC57675649	-6.702		ZINC00093300	-6.111		ZINC45953726	-6.159		ZINC01622217	-5.667
ZINC83308087	-6.736		ZINC00406088	-4.931		ZINC08655696	-4.105		ZINC43758959	-6.69		ZINC01608597	-6.108		ZINC11680753	-6.157		ZINC01433370	-5.667
ZINC31545225	-6.735		ZINC71782700	-4.922		ZINC00155985	-4.102		ZINC82049789	-6.685		ZINC05514859	-6.101		ZINC14653831	-6.154		ZINC34919930	-5.656
ZINC81822245	-6.733		ZINC35278927	-4.919		ZINC11680992	-4.086		ZINC22063174	-6.684		ZINC34863256	-6.101		ZINC00008496	-6.15		ZINC00066085	-5.651
ZINC03869938	-6.722		ZINC01492250	-4.919		ZINC58867591	-4.083		ZINC00388292	-6.662		ZINC14680658	-6.087		ZINC08855117	-6.145		ZINC13209604	-5.649
ZINC02539702	-6.716		ZINC05600768	-4.91		ZINC03874449	-4.078		ZINC71774755	-6.662		ZINC58633067	-6.085		ZINC08613160	-6.143		ZINC01728129	-5.642
ZINC71873490	-6.7		ZINC04658592	-4.902		ZINC03882071	-4.065		ZINC00388554	-6.661		ZINC19517337	-6.085		ZINC02045037	-6.142		ZINC01846526	-5.64
ZINC43772684	-6.696		ZINC00901877	-4.901		ZINC04201314	-4.064		ZINC04576603	-6.655		ZINC04899498	-6.084		ZINC03881283	-6.14		ZINC01680023	-5.637
ZINC05274031	-6.694		ZINC03785357	-4.898		ZINC33932940	-4.046		ZINC04499043	-6.652		ZINC04862950	-6.084		ZINC00967329	-6.133		ZINC04203699	-5.636
ZINC16102469	-6.686		ZINC00895264	-4.891		ZINC87231743	-4.044		ZINC82594735	-6.652		ZINC02516849	-6.082		ZINC72415975	-6.13		ZINC01612537	-5.629
ZINC04728716	-6.679		ZINC08101126	-4.888		ZINC01683304	-4.033		ZINC14728236	-6.65		ZINC05675830	-6.073		ZINC78175059	-6.128		ZINC15894694	-5.628
ZINC04535918	-6.678		ZINC34550389	-4.888		ZINC19415206	-4.017		ZINC04760602	-6.647		ZINC13911250	-6.066		ZINC77303118	-6.125		ZINC44889067	-5.625
ZINC22048035	-6.672		ZINC34283508	-4.882		ZINC01504868	-4.016		ZINC86931787	-6.646		ZINC43772267	-6.058		ZINC01529270	-6.123		ZINC00402495	-5.623
ZINC39064693	-6.668		ZINC04411233	-4.875		ZINC06773873	-4.005		ZINC00157545	-6.645		ZINC01547851	-6.053		ZINC31542954	-6.119		ZINC15524570	-5.623
ZINC38665408	-6.661		ZINC00901781	-4.874		ZINC04658561	-3.997		ZINC77274525	-6.643		ZINC58184799	-6.052		ZINC15205607	-6.117		ZINC02561185	-5.62
ZINC01721748	-6.653		ZINC82839409	-4.871		ZINC13615442	-3.996		ZINC86865138	-6.642		ZINC01850353	-6.052		ZINC01700072	-6.116		ZINC06066912	-5.619
ZINC04803299	-6.649		ZINC04243238	-4.87		ZINC01622055	-3.989		ZINC02583766	-6.64		ZINC01576130	-6.048		ZINC00405336	-6.115		ZINC00336737	-5.619
ZINC12501902	-6.649		ZINC01530432	-4.868		ZINC14954936	-3.974		ZINC04771864	-6.636		ZINC22058142	-6.047		ZINC00156898	-6.114		ZINC82399310	-5.617
ZINC02267680	-6.643		ZINC44786605	-4.867		ZINC12379950	-3.969		ZINC01691257	-6.632		ZINC01698894	-6.045		ZINC04916515	-6.114		ZINC02599214	-5.612
ZINC43772551	-6.64		ZINC13339555	-4.86		ZINC14254620	-3.967		ZINC00402887	-6.629		ZINC05723174	-6.043		ZINC03388592	-6.112		ZINC02487496	-5.612
ZINC15721529	-6.64		ZINC00895531	-4.859		ZINC14775354	-3.966		ZINC02599214	-6.629		ZINC34925456	-6.038		ZINC06070245	-6.112		ZINC02575252	-5.611
ZINC14418229	-6.638		ZINC13339553	-4.858		ZINC02004611	-3.962		ZINC01442731	-6.628		ZINC00895179	-6.035		ZINC18213251	-6.108		ZINC03874449	-5.608
ZINC05220335	-6.636		ZINC32911459	-4.852		ZINC02378779	-3.96		ZINC13517144	-6.623		ZINC02578809	-6.034		ZINC28950516	-6.106		ZINC04533914	-5.606
ZINC02572101	-6.631		ZINC03809490	-4.852		ZINC00031306	-3.947		ZINC77311601	-6.619		ZINC45072292	-6.031		ZINC20728040	-6.105		ZINC00404262	-5.604
ZINC00154538	-6.623		ZINC02034401	-4.844		ZINC00545715	-3.939		ZINC58184798	-6.616		ZINC02516130	-6.017		ZINC04117744	-6.105		ZINC04990799	-5.604
ZINC02380010	-6.623		ZINC34566493	-4.838		ZINC22060813	-3.938		ZINC14728051	-6.614		ZINC35320781	-6.016		ZINC34596375	-6.105		ZINC00154802	-5.604
ZINC60184581	-6.623		ZINC04097148	-4.836		ZINC00640396	-3.931		ZINC00404451	-6.611		ZINC44019492	-6.015		ZINC02243356	-6.101		ZINC00896749	-5.603
ZINC04578655	-6.621		ZINC00399786	-4.833		ZINC06660936	-3.916		ZINC65748053	-6.609		ZINC03898913	-6.014		ZINC00399356	-6.099		ZINC64347390	-5.599
ZINC00156653	-6.618		ZINC17020011	-4.83		ZINC77286873	-3.914		ZINC06524827	-6.608		ZINC05133678	-6.013		ZINC13560595	-6.098		ZINC01586320	-5.595
ZINC03983907	-6.616		ZINC66349229	-4.823		ZINC02036915	-3.91		ZINC06119280	-6.608		ZINC27641620	-6.011		ZINC00179454	-6.097		ZINC00409269	-5.594
ZINC40435342	-6.608		ZINC05631120	-4.822		ZINC04658555	-3.904		ZINC00403284	-6.606		ZINC04899832	-6.008		ZINC02574920	-6.097		ZINC87012421	-5.591
ZINC44699231	-6.607		ZINC05224164	-4.821		ZINC19415204	-3.895		ZINC14825990	-6.606		ZINC13522720	-6.008		ZINC00132552	-6.095		ZINC01720486	-5.589
ZINC60181779	-6.607		ZINC00333065	-4.818		ZINC00517812	-3.892		ZINC45071424	-6.606		ZINC01037068	-6.004		ZINC02528366	-6.093		ZINC12428227	-5.589
ZINC00901888	-6.603		ZINC01655434	-4.814		ZINC22060608	-3.891		ZINC43758960	-6.604		ZINC00390964	-6.004		ZINC03614835	-6.091		ZINC01847418	-5.588
ZINC02516163	-6.595		ZINC00901878	-4.804		ZINC09678256	-3.89		ZINC00403176	-6.598		ZINC00281856	-6.001		ZINC04245717	-6.088		ZINC00394165	-5.584
ZINC39058040	-6.594		ZINC03581429	-4.802		ZINC08715599	-3.889		ZINC13547768	-6.598		ZINC13508887	-6		ZINC00128288	-6.081		ZINC00406211	-5.582
ZINC04760653	-6.588		ZINC02041992	-4.796		ZINC00053675	-3.887		ZINC13759806	-6.597		ZINC16940306	-5.997		ZINC00135391	-6.079		ZINC13547475	-5.579
ZINC93091681	-6.586		ZINC11804135	-4.793		ZINC09096761	-3.886		ZINC00895113	-6.588		ZINC04670171	-5.995		ZINC04097148	-6.078		ZINC00154803	-5.578
ZINC06091723	-6.584		ZINC05282961	-4.789		ZINC00901307	-3.878		ZINC04535918	-6.588		ZINC00077609	-5.983		ZINC00391790	-6.078		ZINC00388613	-5.575
ZINC59846622	-6.575		ZINC00388193	-4.788		ZINC52126494	-3.865		ZINC15277609	-6.587		ZINC05686913	-5.982		ZINC00436637	-6.078		ZINC00389621	-5.575
ZINC38665412	-6.567		ZINC01760657	-4.787		ZINC03809490	-3.86		ZINC17376090	-6.582		ZINC04771863	-5.981		ZINC03871112	-6.077		ZINC00394591	-5.575
ZINC13780673	-6.56		ZINC20363165	-4.785		ZINC77286886	-3.86		ZINC03869312	-6.581		ZINC74941991	-5.981		ZINC00163247	-6.074		ZINC00164395	-5.569
ZINC22055449	-6.56		ZINC01674859	-4.785		ZINC15424137	-3.856		ZINC00120234	-6.581		ZINC02574920	-5.98		ZINC01556948	-6.071		ZINC38136794	-5.567
ZINC05911801	-6.556		ZINC01661184	-4.781		ZINC01855642	-3.854		ZINC03870514	-6.581		ZINC34027345	-5.976		ZINC02560062	-6.069		ZINC90411655	-5.567
ZINC04353077	-6.555		ZINC00134528	-4.78		ZINC06073780	-3.853		ZINC14512177	-6.579		ZINC05284548	-5.972		ZINC13509835	-6.069		ZINC32150081	-5.561
ZINC05620508	-6.554		ZINC31688028	-4.779		ZINC00258739	-3.841		ZINC44608763	-6.572		ZINC12341814	-5.97		ZINC31319823	-6.061		ZINC00388415	-5.56
ZINC25691540	-6.553		ZINC12997615	-4.777		ZINC00367897	-3.838		ZINC40538240	-6.572		ZINC36962564	-5.969		ZINC15894694	-6.06		ZINC15446596	-5.557
ZINC04018123	-6.552		ZINC13600416	-4.775		ZINC03235069	-3.838		ZINC04963949	-6.571		ZINC86933724	-5.966		ZINC00105301	-6.059		ZINC01611434	-5.555
ZINC00330106	-6.55		ZINC33903704	-4.771		ZINC04228265	-3.837		ZINC00388544	-6.57		ZINC01402648	-5.965		ZINC02130720	-6.058		ZINC03888664	-5.553
ZINC71789633	-6.547		ZINC32788203	-4.768		ZINC00182951	-3.828		ZINC08101194	-6.567		ZINC00399552	-5.965		ZINC15017032	-6.053		ZINC05037872	-5.55
ZINC08101194	-6.546		ZINC03830888	-4.762		ZINC09191059	-3.82		ZINC04685854	-6.566		ZINC12406184	-5.958		ZINC00156031	-6.052		ZINC06093351	-5.547
ZINC49171124	-6.542		ZINC19045367	-4.758		ZINC02378780	-3.819		ZINC00156653	-6.562		ZINC00404805	-5.954		ZINC17014709	-6.051		ZINC00094212	-5.544
ZINC04691975	-6.532		ZINC01037070	-4.757		ZINC08614193	-3.816		ZINC02516143	-6.56		ZINC43393039	-5.953		ZINC82049789	-6.05		ZINC01547851	-5.54
ZINC02561185	-6.531		ZINC04181834	-4.757		ZINC94456567	-3.8		ZINC83290847	-6.559		ZINC01593824	-5.952		ZINC02572654	-6.05		ZINC00406903	-5.537
ZINC08378996	-6.53		ZINC00895124	-4.739		ZINC04830901	-3.791		ZINC34919930	-6.559		ZINC04946582	-5.952		ZINC14592127	-6.05		ZINC08614193	-5.536
ZINC39946856	-6.529		ZINC08214514	-4.735		ZINC01587860	-3.782		ZINC03830178	-6.558		ZINC75278547	-5.95		ZINC00156288	-6.049		ZINC06468484	-5.533
ZINC84847539	-6.528		ZINC04544573	-4.733		ZINC06477956	-3.779		ZINC02560921	-6.55		ZINC04862947	-5.947		ZINC01590754	-6.045		ZINC00164791	-5.531
ZINC89360858	-6.526		ZINC02575736	-4.729		ZINC01680828	-3.773		ZINC38665412	-6.549		ZINC20392371	-5.946		ZINC00388292	-6.044		ZINC01532566	-5.53
ZINC16102471	-6.525		ZINC13339554	-4.729		ZINC11092016	-3.764		ZINC04164431	-6.547		ZINC77274525	-5.942		ZINC38545654	-6.044		ZINC38339150	-5.529
ZINC19428599	-6.523		ZINC05839912	-4.725		ZINC04202477	-3.757		ZINC02545870	-6.543		ZINC13508072	-5.941		ZINC02522480	-6.042		ZINC00123145	-5.519
ZINC03872996	-6.522		ZINC00154564	-4.721		ZINC08612357	-3.756		ZINC03869311	-6.542		ZINC00895175	-5.94		ZINC01759739	-6.039		ZINC03875041	-5.516
ZINC00402831	-6.52		ZINC04862948	-4.718		ZINC22062147	-3.753		ZINC13354218	-6.54		ZINC43772403	-5.939		ZINC14643439	-6.036		ZINC02585424	-5.516
ZINC69442876	-6.518		ZINC01677332	-4.71		ZINC03874447	-3.728		ZINC04823726	-6.531		ZINC78917750	-5.938		ZINC03394296	-6.035		ZINC04664757	-5.514
ZINC89361465	-6.512		ZINC13612564	-4.709		ZINC35325444	-3.723		ZINC35565180	-6.529		ZINC91360450	-5.937		ZINC01550030	-6.035		ZINC00040722	-5.513
ZINC89362402	-6.511		ZINC01693258	-4.699		ZINC77286893	-3.691		ZINC77301376	-6.529		ZINC93116146	-5.933		ZINC08952459	-6.03		ZINC00056399	-5.512
ZINC06158056	-6.511		ZINC00901791	-4.699		ZINC02378701	-3.69		ZINC04556648	-6.528		ZINC00388161	-5.926		ZINC77303121	-6.028		ZINC02166823	-5.51
ZINC04762078	-6.509		ZINC04682893	-4.691		ZINC22060324	-3.684		ZINC05390388	-6.528		ZINC06760925	-5.926		ZINC83302792	-6.028		ZINC44796464	-5.508
ZINC15721965	-6.509		ZINC38644404	-4.691		ZINC19898286	-3.683		ZINC14418229	-6.528		ZINC36458537	-5.925		ZINC00154540	-6.027		ZINC44796461	-5.504
ZINC25691544	-6.508		ZINC03847160	-4.684		ZINC19781679	-3.682		ZINC00120144	-6.521		ZINC00101897	-5.922		ZINC01688384	-6.027		ZINC00154800	-5.504
ZINC82049789	-6.507		ZINC22055784	-4.68		ZINC13630907	-3.679		ZINC65734440	-6.516		ZINC82411224	-5.92		ZINC00000922	-6.022		ZINC04096578	-5.504
ZINC00065873	-6.498		ZINC01823084	-4.676		ZINC02083402	-3.677		ZINC04528580	-6.515		ZINC01845495	-5.915		ZINC02163992	-6.018		ZINC11803498	-5.498
ZINC27644681	-6.498		ZINC02164507	-4.665		ZINC02471059	-3.676		ZINC04823727	-6.512		ZINC27641854	-5.913		ZINC45953674	-6.018		ZINC04655223	-5.495
ZINC02166823	-6.496		ZINC12502813	-4.658		ZINC86340756	-3.667		ZINC04543940	-6.508		ZINC70226684	-5.91		ZINC04831001	-6.017		ZINC00157526	-5.494
ZINC02530804	-6.494		ZINC04691974	-4.658		ZINC01766070	-3.66		ZINC83308087	-6.498		ZINC11937926	-5.91		ZINC13514509	-6.015		ZINC79025474	-5.494
ZINC03869967	-6.493		ZINC33995324	-4.656		ZINC05007695	-3.659		ZINC01576270	-6.492		ZINC08715600	-5.906		ZINC03871576	-6.012		ZINC00057750	-5.492
ZINC01420532	-6.492		ZINC95080157	-4.652		ZINC36070894	-3.659		ZINC65740709	-6.488		ZINC03978745	-5.906		ZINC05106290	-6.011		ZINC00156898	-5.491
ZINC00402826	-6.492		ZINC19737051	-4.649		ZINC01391279	-3.647		ZINC38253364	-6.479		ZINC26473869	-5.906		ZINC00156675	-6.011		ZINC06073780	-5.488
ZINC04340289	-6.49		ZINC02539702	-4.642		ZINC08246843	-3.64		ZINC00388081	-6.475		ZINC84598575	-5.906		ZINC00129406	-6.01		ZINC77286886	-5.487
ZINC61389419	-6.49		ZINC00895164	-4.632		ZINC02275525	-3.64		ZINC86033362	-6.472		ZINC08101192	-5.905		ZINC22061611	-6.01		ZINC00153908	-5.486
ZINC04762040	-6.49		ZINC01622055	-4.631		ZINC00267950	-3.636		ZINC08579359	-6.471		ZINC00388081	-5.904		ZINC84443449	-6.01		ZINC04762133	-5.485
ZINC02539703	-6.486		ZINC05837575	-4.627		ZINC08778492	-3.629		ZINC08855117	-6.471		ZINC00058111	-5.899		ZINC45953677	-6.01		ZINC01678601	-5.484
ZINC89914557	-6.485		ZINC03598263	-4.626		ZINC00282243	-3.622		ZINC00279620	-6.47		ZINC57211592	-5.898		ZINC84693214	-6.008		ZINC77287074	-5.482
ZINC14728393	-6.481		ZINC01677331	-4.625		ZINC08246863	-3.617		ZINC04831001	-6.469		ZINC21302830	-5.891		ZINC01686996	-6.007		ZINC34352310	-5.482
ZINC45953677	-6.479		ZINC02026774	-4.624		ZINC26441109	-3.614		ZINC04576601	-6.469		ZINC86232322	-5.889		ZINC78175055	-6.007		ZINC32182269	-5.48
ZINC08101192	-6.473		ZINC71606223	-4.622		ZINC00001795	-3.612		ZINC02040858	-6.468		ZINC02164321	-5.888		ZINC40174353	-6.006		ZINC26460187	-5.478
ZINC05331260	-6.471		ZINC01848385	-4.621		ZINC03024617	-3.611		ZINC04556983	-6.466		ZINC05497555	-5.887		ZINC00162391	-6.005		ZINC13551368	-5.474
ZINC04899569	-6.471		ZINC38545472	-4.62		ZINC35320781	-3.609		ZINC00393977	-6.461		ZINC17189482	-5.886		ZINC87025835	-6.004		ZINC00002028	-5.473
ZINC04576603	-6.466		ZINC03869939	-4.618		ZINC61992896	-3.607		ZINC05413017	-6.459		ZINC34781669	-5.886		ZINC06585367	-6.003		ZINC39208621	-5.472
ZINC05613301	-6.465		ZINC12647844	-4.616		ZINC43769563	-3.605		ZINC00057058	-6.457		ZINC01701247	-5.885		ZINC77274528	-6.002		ZINC04831001	-5.472
ZINC03812874	-6.459		ZINC01558053	-4.613		ZINC65742985	-3.604		ZINC05390389	-6.457		ZINC01616625	-5.885		ZINC16125190	-6.001		ZINC04576601	-5.471
ZINC04899706	-6.458		ZINC40448663	-4.613		ZINC94454064	-3.599		ZINC35384958	-6.455		ZINC05134434	-5.883		ZINC32191440	-6		ZINC34307600	-5.47
ZINC38545654	-6.458		ZINC34689286	-4.612		ZINC00073860	-3.596		ZINC79025474	-6.454		ZINC43772401	-5.882		ZINC14728393	-5.998		ZINC04521662	-5.468
ZINC06157442	-6.455		ZINC31688033	-4.611		ZINC39129916	-3.596		ZINC05274105	-6.453		ZINC91840205	-5.881		ZINC00001688	-5.997		ZINC00395645	-5.468
ZINC76935784	-6.455		ZINC00895175	-4.611		ZINC21449433	-3.591		ZINC04543657	-6.452		ZINC27641406	-5.871		ZINC37388348	-5.993		ZINC15047082	-5.465
ZINC04899474	-6.453		ZINC16123488	-4.604		ZINC04825630	-3.59		ZINC17376082	-6.451		ZINC30836162	-5.87		ZINC06585348	-5.992		ZINC00901320	-5.458
ZINC34348431	-6.452		ZINC39246949	-4.602		ZINC11092293	-3.59		ZINC29131748	-6.451		ZINC02166537	-5.869		ZINC00338348	-5.988		ZINC00388397	-5.452
ZINC77293018	-6.451		ZINC13517679	-4.6		ZINC39348467	-3.589		ZINC13523533	-6.45		ZINC41228795	-5.867		ZINC04023500	-5.986		ZINC00002055	-5.449
ZINC25631292	-6.45		ZINC04202464	-4.6		ZINC08452891	-3.586		ZINC06071788	-6.447		ZINC27641536	-5.864		ZINC05161651	-5.983		ZINC36666983	-5.446
ZINC00895265	-6.449		ZINC75524496	-4.594		ZINC00638630	-3.584		ZINC04097426	-6.446		ZINC00403991	-5.864		ZINC03338076	-5.982		ZINC77311601	-5.446
ZINC05494942	-6.449		ZINC00390964	-4.588		ZINC15013977	-3.582		ZINC01608473	-6.444		ZINC09610984	-5.863		ZINC94458896	-5.981		ZINC19737032	-5.44
ZINC02562358	-6.443		ZINC01655440	-4.587		ZINC92619711	-3.581		ZINC08830749	-6.442		ZINC01614157	-5.862		ZINC00152954	-5.98		ZINC00152954	-5.439
ZINC04018120	-6.441		ZINC13544404	-4.583		ZINC77301924	-3.58		ZINC01562126	-6.441		ZINC02048520	-5.861		ZINC34198867	-5.98		ZINC00388554	-5.439
ZINC94569795	-6.439		ZINC34283541	-4.579		ZINC01576782	-3.579		ZINC00901157	-6.44		ZINC00388178	-5.861		ZINC39417572	-5.979		ZINC04530928	-5.438
ZINC04963101	-6.435		ZINC20428668	-4.579		ZINC01423267	-3.579		ZINC00388461	-6.439		ZINC00403346	-5.86		ZINC34352310	-5.978		ZINC12501179	-5.436
ZINC04602228	-6.435		ZINC01759056	-4.578		ZINC06756692	-3.577		ZINC01590754	-6.438		ZINC01319816	-5.857		ZINC01529975	-5.978		ZINC00157085	-5.435
ZINC01845978	-6.434		ZINC95079888	-4.577		ZINC33822027	-3.573		ZINC01573790	-6.437		ZINC39062491	-5.857		ZINC88613707	-5.978		ZINC00156701	-5.433
ZINC13440025	-6.433		ZINC04202333	-4.577		ZINC04658557	-3.563		ZINC01602059	-6.435		ZINC94454290	-5.854		ZINC03812874	-5.978		ZINC32139718	-5.431
ZINC02583736	-6.432		ZINC08672850	-4.577		ZINC01720722	-3.559		ZINC27642114	-6.434		ZINC27642343	-5.853		ZINC00895230	-5.978		ZINC01420532	-5.429
ZINC04095478	-6.429		ZINC04228181	-4.574		ZINC12562003	-3.545		ZINC94682355	-6.432		ZINC12437226	-5.852		ZINC01683990	-5.976		ZINC03357845	-5.428
ZINC00599734	-6.429		ZINC32150081	-4.574		ZINC01693258	-3.54		ZINC94865966	-6.431		ZINC32180514	-5.852		ZINC01721748	-5.973		ZINC79025472	-5.427
ZINC39317303	-6.427		ZINC02578809	-4.572		ZINC25691770	-3.536		ZINC04916515	-6.431		ZINC27644681	-5.847		ZINC01402648	-5.973		ZINC68094642	-5.426
ZINC86865138	-6.425		ZINC04862950	-4.571		ZINC05224164	-3.53		ZINC72400631	-6.43		ZINC01607318	-5.845		ZINC00314389	-5.972		ZINC00185722	-5.425
ZINC16929987	-6.424		ZINC03869937	-4.567		ZINC04658560	-3.528		ZINC02267682	-6.428		ZINC00722400	-5.842		ZINC33604885	-5.972		ZINC05086465	-5.421
ZINC02047457	-6.423		ZINC75528984	-4.566		ZINC86929213	-3.528		ZINC35565183	-6.427		ZINC64033393	-5.84		ZINC00182713	-5.972		ZINC16310173	-5.417
ZINC01728891	-6.422		ZINC01482113	-4.564		ZINC93967807	-3.521		ZINC86003101	-6.423		ZINC00031306	-5.839		ZINC00065873	-5.97		ZINC01618046	-5.416
ZINC49171228	-6.421		ZINC00895179	-4.563		ZINC21449411	-3.514		ZINC04899521	-6.422		ZINC06119307	-5.839		ZINC20064272	-5.969		ZINC25726181	-5.414
ZINC04533598	-6.42		ZINC01850964	-4.551		ZINC06073781	-3.514		ZINC03641660	-6.42		ZINC05414854	-5.837		ZINC06095504	-5.969		ZINC00057290	-5.413
ZINC86396600	-6.419		ZINC01691361	-4.549		ZINC20354175	-3.513		ZINC06095504	-6.419		ZINC39307463	-5.834		ZINC05106295	-5.968		ZINC19737029	-5.412
ZINC37269125	-6.417		ZINC33358830	-4.545		ZINC05368843	-3.511		ZINC04395817	-6.419		ZINC00168598	-5.833		ZINC01656422	-5.967		ZINC00519016	-5.409
ZINC12353732	-6.417		ZINC04403643	-4.541		ZINC15956298	-3.509		ZINC11592756	-6.415		ZINC87440033	-5.831		ZINC00226545	-5.966		ZINC19230162	-5.408
