# Supplementary material for: A multiple-step in silico screening protocol to identify allosteric inhibitors of Spike–hACE2 binding
Source: Royal Society of Chemistry journal article supplement (doi:10.1039/d1cp04736a), 2022-01-01
Supplement: d1cp04736a2.xlsx [file d1cp04736a2.xlsx]

## Sheet: Sheet1
LIGAND_ID	ΔEvdw	ΔEele	ΔGsol-p	ΔGsol-np	TΔS	MMPBSA	Round
1023756-44-6	-53.44±0.69	-69.09±3.47	100.07±3.32	-5.33±0.03	-24.39±0.10	-3.41±0.27	Round1
1053055-44-9	-45.99±0.45	-14.37±1.71	41.12±0.74	-3.71±0.02	-19.85±0.14	-3.09±0.71	Round1
149297-82-5	-39.47±0.89	-77.18±1.99	95.86±2.08	-3.27±0.01	-18.95±0.17	-5.09±0.58	Round1
1807796-52-6	-52.21±0.79	-14.14±0.24	49.74±0.60	-4.98±0.04	-23.36±0.15	1.77±0.57	Round1
2001001-59-6	-54.23±0.24	-77.34±2.88	95.92±2.36	-4.26±0.05	-25.22±0.18	-14.70±0.69	Round1
2254342-06-6	-30.76±0.64	-39.49±1.12	58.83±0.72	-2.63±0.01	-17.83±0.10	3.78±0.36	Round1
1002334-80-6	-48.44±0.81	-59.72±1.85	90.60±2.25	-4.86±0.08	-22.73±0.28	0.31±2.16	Round1
BDH_34017774	-26.63±0.28	-14.91±0.62	30.45±0.52	-2.33±0.03	-16.65±0.12	3.23±0.05	Round1
DB00183	-30.03±0.93	-15.51±1.07	31.96±0.18	-2.92±0.08	-18.13±0.22	1.63±0.16	Round1
BDG_33930183	-26.62±0.80	-15.57±0.35	29.95±0.89	-1.82±0.03	-16.57±0.11	2.52±0.35	Round1
DB00277	-11.76±0.47	-8.51±0.47	13.30±0.23	-0.54±0.03	-12.90±0.04	5.39±0.07	Round1
DB00646	-40.00±0.24	-38.37±1.36	63.53±0.92	-4.59±0.06	-21.12±0.14	1.70±0.42	Round1
DB00581	-20.96±0.43	-33.37±2.19	49.69±1.59	-2.01±0.04	-17.34±0.02	10.70±0.36	Round1
DB01068	-12.84±0.08	-1.16±0.84	4.86±0.78	-0.91±0.03	-14.30±0.05	4.26±0.05	Round1
LAS_34151389	-19.44±0.09	-21.05±1.91	30.43±1.46	-1.57±0.02	-15.71±0.15	4.08±0.46	Round1
1002334-80-6	-41.75±1.01	-117.02±3.12	129.30±3.65	-4.04±0.12	-22.58±0.43	-10.93±0.97	Round2
1023756-44-6	-39.14±0.73	-19.57±0.83	45.50±0.83	-3.44±0.04	-19.40±0.27	2.75±1.05	Round2
1053055-44-9	-53.35±0.59	-22.70±0.57	47.32±0.21	-4.62±0.02	-22.65±0.02	-10.70±0.19	Round2
149297-82-5	-34.52±0.99	-99.45±2.11	109.97±1.48	-2.75±0.03	-19.42±0.14	-7.33±0.78	Round2
1807796-52-6	-49.98±0.44	-19.63±0.54	47.07±1.37	-4.74±0.04	-22.23±0.04	-5.05±0.59	Round2
2001001-59-6	-56.36±0.64	-68.33±0.66	93.07±0.68	-4.57±0.04	-25.31±0.21	-10.88±0.93	Round2
2254342-06-6	-38.29±0.20	-15.00±1.18	42.22±1.53	-3.25±0.04	-18.78±0.22	4.46±0.31	Round2
BDG_33930183	-11.19±0.18	-8.22±0.91	13.87±0.94	-0.60±0.06	-13.21±0.21	7.08±0.71	Round2
BDH_34017774	-18.62±0.49	-15.98±1.59	25.94±1.69	-1.47±0.03	-15.04±0.13	4.90±0.13	Round2
DB00183	-50.58±0.17	-49.10±1.80	81.65±1.37	-4.33±0.03	-24.47±0.03	2.10±0.33	Round2
DB00277	-11.50±0.52	-6.40±1.06	13.08±1.04	-0.38±0.05	-12.93±0.15	7.73±0.48	Round2
DB00581	-20.26±0.25	-23.15±1.41	38.36±1.49	-1.83±0.07	-16.30±0.03	9.42±0.49	Round2
DB00646	-23.04±0.60	-45.12±2.23	59.52±1.29	-2.23±0.04	-16.34±0.07	5.47±0.57	Round2
DB01068	-19.68±0.12	-14.29±2.51	21.61±2.18	-2.04±0.02	-16.69±0.11	2.29±0.46	Round2
LAS_34151389	-29.01±0.69	-22.49±1.16	39.67±0.44	-2.52±0.05	-17.58±0.11	3.24±1.42	Round2
1002334-80-6	-38.24±0.79	-89.81±3.29	106.13±3.68	-3.91±0.03	-21.56±0.08	-4.28±1.10	Round3
1053055-44-9	-43.79±0.45	-42.31±0.97	62.03±1.88	-4.19±0.08	-20.80±0.10	-7.47±1.10	Round3
1807796-52-6	-49.00±0.87	-26.79±2.35	49.49±2.28	-3.77±0.07	-22.14±0.22	-7.93±0.60	Round3
1023756-44-6	-41.37±0.67	-35.19±1.69	63.54±2.06	-4.11±0.06	-21.23±0.32	4.10±0.60	Round3
149297-82-5	-38.74±1.40	-130.02±3.41	139.55±1.87	-3.47±0.02	-21.22±0.18	-11.46±0.65	Round3
2001001-59-6	-53.51±0.86	-43.38±2.20	70.48±1.16	-4.44±0.02	-24.28±0.23	-6.57±1.01	Round3
1002334-80-6	-50.63±0.43	-63.31±1.71	100.11±1.22	-4.66±0.09	-23.40±0.19	4.91±0.83	Round4
1053055-44-9	-57.17±0.90	-47.88±1.46	73.59±1.36	-5.18±0.02	-24.33±0.07	-12.31±0.80	Round4
1807796-52-6	-43.86±0.69	-10.04±1.18	40.54±1.42	-3.75±0.01	-21.03±0.12	3.91±1.10	Round4
1023756-44-6	-40.28±0.59	-26.93±1.20	50.77±1.41	-4.26±0.04	-20.97±0.21	0.27±0.19	Round4
149297-82-5	-44.30±0.94	-113.51±3.88	133.96±4.04	-3.64±0.04	-21.85±0.09	-5.63±0.61	Round4
2001001-59-6	-52.57±0.53	-62.68±0.96	87.41±0.80	-4.20±0.04	-24.12±0.17	-7.92±0.41	Round4
1002334-80-6	-38.57±0.64	-77.46±2.04	91.57±3.13	-3.79±0.06	-21.66±0.13	-6.60±1.16	Round5
1053055-44-9	-51.91±0.62	-46.94±2.27	75.46±1.26	-5.16±0.03	-22.29±0.13	-6.27±0.90	Round5
1807796-52-6	-35.35±0.85	-9.44±0.26	30.82±0.66	-3.53±0.06	-18.95±0.19	1.45±1.12	Round5
1023756-44-6	-33.75±0.34	-5.44±1.29	28.11±2.32	-3.00±0.04	-18.18±0.10	4.10±1.44	Round5
149297-82-5	-32.94±0.13	-114.36±3.41	117.61±1.92	-2.79±0.03	-20.09±0.25	-12.39±1.46	Round5
2001001-59-6	-59.42±0.83	-31.42±1.81	59.25±2.66	-4.94±0.06	-25.54±0.13	-11.01±0.10	Round5
