# Supplementary material for: A multiple-step in silico screening protocol to identify allosteric inhibitors of Spike–hACE2 binding
Source: Royal Society of Chemistry journal article supplement (doi:10.1039/d1cp04736a), 2022-01-01
Supplement: d1cp04736a5.xlsx [file d1cp04736a5.xlsx]

## Sheet: Table S4
LIGAND_ID	ΔEvdw	ΔEele	ΔGsol-p	ΔGsol-np	TΔS	MMPBSA	Round
NCGC00179612-03	-23.50±0.10	-51.74±1.56	60.93±0.78	-2.27±0.02	-18.30±0.06	1.72±0.74	Round1
NCGC00381723-02	-22.05±0.74	-20.15±1.01	30.12±0.75	-1.68±0.08	-16.19±0.19	2.44±0.27	Round1
NCGC00164595-02	-0.58±0.16	-0.94±0.70	1.18±0.38	0.79±0.04	-10.63±0.09	11.07±0.48	Round1
NCGC00181743-02	-37.78±0.29	-28.81±0.14	48.13±0.14	-3.31±0.02	-21.32±0.01	-0.44±0.03	Round1
NCGC00386028-03	-37.89±0.64	-50.71±0.45	67.90±0.16	-2.97±0.04	-19.71±0.20	-3.95±0.11	Round1
NCGC00485882-01	-15.98±0.82	-48.26±0.81	51.47±0.09	-1.30±0.03	-16.09±0.09	2.01±0.73	Round1
NCGC00166210-02	-35.17±1.02	-66.71±0.66	85.93±2.12	-3.48±0.04	-21.24±0.28	1.82±1.60	Round1
NCGC00182033-01	-32.70±0.98	-20.30±1.87	43.53±1.02	-3.10±0.04	-18.81±0.24	6.24±1.33	Round1
NCGC00389655-01	-31.56±0.62	-40.92±2.15	61.52±1.55	-2.99±0.02	-19.10±0.09	5.17±0.68	Round1
NCGC00509864-02	-22.89±0.57	-21.21±0.68	38.25±0.94	-1.77±0.07	-16.32±0.31	8.70±0.41	Round1
NCGC00389662-01	-40.93±0.14	-19.78±0.68	43.79±0.95	-4.00±0.02	-20.55±0.09	-0.37±0.29	Round1
NCGC00521952-01	-69.56±0.42	-56.28±1.35	95.00±1.25	-6.87±0.07	-29.77±0.17	-7.94±0.44	Round1
NCGC00167505-03	-40.01±0.12	-86.98±0.34	99.02±0.72	-3.70±0.02	-22.51±0.14	-9.16±0.89	Round1
NCGC00379034-03	-52.65±0.58	-54.84±2.02	84.49±1.97	-5.39±0.10	-25.28±0.32	-3.12±0.40	Round1
NCGC00179313-05	-39.08±0.20	-74.88±2.50	88.43±2.39	-2.98±0.06	-21.99±0.17	-6.52±0.29	Round1
NCGC00379053-02	-35.36±0.64	-19.05±1.39	37.58±1.34	-3.37±0.01	-19.53±0.07	-0.67±0.64	Round1
NCGC00482516-02	-42.82±0.78	-28.05±0.72	52.95±0.77	-3.80±0.04	-20.89±0.21	-0.82±0.32	Round1
NCGC00599627-01	-23.39±0.95	-61.31±1.98	65.63±2.28	-2.33±0.05	-16.51±0.25	-4.89±0.48	Round1
NCGC00179612-03	-25.15±0.74	-47.64±1.20	60.70±0.40	-2.45±0.03	-18.30±0.09	3.75±1.75	Round2
NCGC00381723-02	-4.87±0.32	-3.54±0.29	6.45±0.42	0.36±0.03	-11.63±0.11	10.03±0.02	Round2
NCGC00164595-02	-10.74±0.67	-36.39±5.41	39.74±3.12	-1.00±0.13	-14.75±0.26	6.36±1.68	Round2
NCGC00181743-02	-26.74±1.29	-14.31±1.57	31.31±1.44	-2.13±0.06	-17.39±0.23	5.50±0.97	Round2
NCGC00386028-03	-24.97±0.42	-60.56±0.44	69.04±1.45	-2.16±0.01	-18.06±0.07	-0.59±0.88	Round2
NCGC00485882-01	-23.83±0.04	-68.65±0.18	69.10±0.53	-1.69±0.02	-18.49±0.05	-6.58±0.42	Round2
NCGC00166210-02	-32.76±0.31	-58.64±0.65	78.75±0.93	-2.91±0.04	-20.59±0.12	5.03±0.58	Round2
NCGC00182033-01	-23.47±0.33	-26.86±0.45	41.90±0.18	-2.03±0.09	-16.61±0.10	6.16±0.59	Round2
NCGC00389655-01	-30.63±0.66	-35.32±1.76	54.10±1.16	-2.79±0.03	-18.93±0.17	4.29±0.86	Round2
NCGC00509864-02	-8.30±0.58	-7.74±1.63	12.28±1.37	-0.26±0.09	-12.63±0.20	8.61±0.15	Round2
NCGC00389662-01	-48.60±0.65	-30.52±0.13	57.51±0.21	-4.07±0.03	-22.01±0.17	-3.67±0.33	Round2
NCGC00521952-01	-36.61±0.36	-60.21±2.80	79.08±2.62	-4.30±0.07	-21.20±0.27	-0.83±0.44	Round2
NCGC00167505-03	-48.03±0.81	-101.42±3.35	113.23±2.33	-3.85±0.05	-24.64±0.14	-15.42±1.51	Round2
NCGC00379034-03	-33.19±1.05	-20.34±1.42	36.12±1.91	-3.17±0.09	-19.08±0.29	-1.49±0.43	Round2
NCGC00179313-05	-22.23±0.38	-20.87±1.49	32.95±1.78	-1.82±0.06	-16.46±0.17	4.49±0.27	Round2
NCGC00379053-02	-31.37±0.70	-31.85±0.88	51.88±0.68	-2.78±0.08	-17.77±0.19	3.65±0.38	Round2
NCGC00482516-02	-34.38±1.06	-16.44±1.22	32.45±1.05	-3.23±0.06	-19.00±0.26	-2.61±1.08	Round2
NCGC00599627-01	-22.44±0.44	-31.08±3.29	43.71±2.78	-1.81±0.06	-15.98±0.15	4.37±0.47	Round2
NCGC00179612-03	-33.94±0.33	-49.66±3.53	65.07±3.33	-3.06±0.03	-20.64±0.06	-0.94±1.17	Round3
NCGC00381723-02	-26.40±0.72	-38.65±0.76	54.81±1.08	-2.51±0.06	-17.79±0.09	5.04±0.59	Round3
NCGC00164595-02	-2.64±0.37	-19.89±1.00	16.82±0.59	0.24±0.02	-12.09±0.02	6.61±0.27	Round3
NCGC00181743-02	-30.21±0.85	-20.74±0.76	38.54±2.00	-2.56±0.05	-19.18±0.14	4.22±0.62	Round3
NCGC00386028-03	-31.50±1.13	-92.26±3.35	100.95±2.13	-3.26±0.02	-20.38±0.08	-5.70±0.33	Round3
NCGC00485882-01	-27.14±0.57	-32.74±1.97	45.20±2.13	-2.14±0.02	-17.34±0.18	0.51±0.35	Round3
NCGC00166210-02	-35.78±0.79	-54.99±0.64	77.85±1.28	-3.03±0.05	-20.78±0.15	4.83±0.71	Round3
NCGC00182033-01	-30.81±1.15	-7.70±0.46	26.95±0.42	-2.71±0.12	-17.67±0.31	3.41±0.34	Round3
NCGC00389655-01	-32.28±0.28	-27.09±1.28	46.08±2.84	-2.97±0.05	-19.16±0.09	2.91±1.62	Round3
NCGC00509864-02	-32.49±0.78	-24.03±0.74	44.28±1.34	-3.33±0.04	-18.97±0.13	3.40±0.66	Round3
NCGC00389662-01	-45.27±0.98	-36.46±1.95	56.96±1.98	-4.41±0.01	-21.68±0.05	-7.50±0.90	Round3
NCGC00521952-01	-42.61±0.72	-43.52±2.70	57.52±2.36	-4.80±0.05	-23.33±0.23	-10.09±0.29	Round3
NCGC00167505-03	-34.36±0.52	-39.90±0.56	58.01±1.07	-2.93±0.02	-19.35±0.03	0.17±0.35	Round3
NCGC00379034-03	-47.57±1.07	-36.42±1.54	65.17±1.34	-4.93±0.05	-23.74±0.34	-0.01±0.55	Round3
NCGC00179313-05	-23.66±0.44	-49.94±0.70	56.12±0.72	-1.88±0.05	-17.66±0.20	-1.70±1.02	Round3
NCGC00379053-02	-71.09±0.28	-58.71±0.96	92.43±0.93	-6.58±0.03	-30.62±0.07	-13.33±0.18	Round3
NCGC00482516-02	-37.27±0.96	-64.21±3.39	77.89±1.78	-4.03±0.03	-21.94±0.15	-5.68±1.21	Round3
NCGC00599627-01	-27.20±0.17	-64.87±0.98	70.23±0.88	-2.77±0.02	-19.79±0.06	-4.82±1.03	Round3
NCGC00386028-03	-26.08±0.22	-73.23±0.88	78.84±1.03	-2.44±0.01	-18.67±0.02	-4.24±1.05	Round4
NCGC00485882-01	-23.95±0.65	-60.59±1.16	62.62±1.78	-1.66±0.03	-18.21±0.09	-5.37±0.12	Round4
NCGC00389662-01	-27.93±0.73	-22.75±0.39	38.64±0.81	-2.45±0.05	-17.62±0.23	3.13±0.16	Round4
NCGC00521952-01	-36.06±0.69	-79.12±0.82	85.62±0.64	-3.80±0.04	-23.08±0.08	-10.29±1.09	Round4
NCGC00167505-03	-44.66±0.22	-98.60±3.17	111.06±2.66	-3.57±0.04	-24.28±0.12	-11.51±0.35	Round4
NCGC00179313-05	-23.44±0.43	-50.11±1.58	57.67±0.55	-1.86±0.05	-17.50±0.17	-0.25±1.51	Round4
NCGC00379053-02	-38.04±0.24	-26.01±0.16	44.29±0.49	-3.26±0.03	-20.84±0.08	-2.18±0.73	Round4
NCGC00482516-02	-16.91±0.82	-56.12±2.24	51.07±1.88	-2.21±0.04	-16.51±0.15	-7.66±1.00	Round4
NCGC00386028-03	-22.64±0.52	-26.15±2.01	39.23±1.78	-1.79±0.06	-16.11±0.12	4.76±0.85	Round5
NCGC00485882-01	-23.04±0.33	-39.65±2.24	55.21±1.95	-1.83±0.03	-16.97±0.17	7.65±0.58	Round5
NCGC00389662-01	-59.71±0.28	-58.55±1.06	84.50±0.42	-5.69±0.02	-26.10±0.13	-13.34±0.68	Round5
NCGC00521952-01	-40.30±0.95	-32.03±2.46	49.21±2.05	-4.32±0.09	-22.42±0.25	-5.02±0.38	Round5
NCGC00167505-03	-36.74±0.51	-93.00±1.76	101.64±0.63	-3.25±0.07	-21.32±0.13	-10.04±0.70	Round5
NCGC00179313-05	-25.72±0.43	-51.41±1.40	60.52±0.90	-1.97±0.04	-18.44±0.16	-0.13±0.51	Round5
NCGC00379053-02	-44.20±0.74	-20.52±0.64	44.46±1.23	-3.97±0.04	-22.32±0.22	-1.92±0.11	Round5
NCGC00482516-02	-33.18±0.51	-24.26±2.39	38.46±2.27	-3.34±0.02	-19.08±0.06	-3.22±0.54	Round5
