# Supplementary material for: A multiple-step in silico screening protocol to identify allosteric inhibitors of Spike–hACE2 binding
Source: Royal Society of Chemistry journal article supplement (doi:10.1039/d1cp04736a), 2022-01-01
Supplement: d1cp04736a6.xlsx [file d1cp04736a6.xlsx]

## Sheet: Table S5
LIGAND_ID	ΔEvdw	ΔEele	ΔGsol-p	ΔGsol-np	TΔS	MMPBSA	Round
NCGC00017331-08	-21.14±0.17	-37.60±2.08	44.26±1.59	-1.94±0.02	-15.97±0.12	-0.45±0.29	Round1
NCGC00018117-17	-3.97±0.29	-0.72±0.27	2.59±0.75	0.44±0.04	-11.14±0.07	9.48±0.25	Round1
NCGC00021202-03	-27.53±0.24	-33.10±2.01	39.99±1.08	-2.09±0.04	-18.50±0.14	-4.22±0.83	Round1
NCGC00160628-03	-32.03±0.65	-16.60±2.00	39.01±1.66	-2.58±0.07	-17.51±0.24	5.31±0.87	Round1
NCGC00164563-04	-27.51±0.32	-31.49±2.00	46.11±0.31	-2.37±0.01	-17.95±0.10	2.69±1.67	Round1
NCGC00164563-06	-18.33±0.12	-18.48±1.82	27.76±1.25	-1.28±0.02	-14.84±0.10	4.52±0.54	Round1
NCGC00167553-02	-0.77±0.12	-0.91±0.18	1.54±0.43	0.80±0.02	-10.64±0.04	11.29±0.22	Round1
NCGC00179612-03	-29.44±0.91	-58.37±2.26	66.59±0.74	-2.68±0.03	-19.36±0.08	-4.54±1.87	Round1
NCGC00181743-02	-30.07±0.41	-21.85±0.54	41.33±0.42	-2.75±0.05	-18.34±0.14	4.99±0.77	Round1
NCGC00345789-05	-52.98±1.01	-30.69±0.29	62.77±1.11	-5.06±0.06	-23.66±0.28	-2.30±1.23	Round1
NCGC00386235-04	-39.61±0.64	-32.40±1.10	57.29±1.11	-3.75±0.03	-20.56±0.15	2.09±0.32	Round1
NCGC00386235-06	-49.87±0.11	-20.49±0.53	44.41±0.39	-4.24±0.08	-23.01±0.14	-7.18±0.34	Round1
NCGC00387803-01	-34.43±0.65	-23.62±1.19	43.28±1.31	-3.50±0.08	-19.38±0.11	1.10±0.66	Round1
NCGC00599627-01	-24.14±0.65	-78.77±3.49	88.93±2.32	-2.65±0.06	-17.54±0.21	0.92±1.01	Round1
NCGC00017331-08	-25.75±0.40	-36.43±3.22	50.31±1.55	-2.28±0.04	-17.80±0.04	3.64±1.47	Round2
NCGC00018117-17	-20.17±0.37	-16.49±0.61	27.32±0.28	-1.15±0.02	-15.28±0.04	4.79±0.18	Round2
NCGC00021202-03	-32.77±0.63	-43.13±1.42	57.12±1.91	-2.27±0.03	-20.09±0.16	-0.96±0.75	Round2
NCGC00160628-03	-34.61±0.14	-34.95±0.77	52.21±1.16	-3.04±0.01	-19.25±0.04	-1.14±0.59	Round2
NCGC00164563-04	-24.46±0.69	-37.40±0.67	49.17±0.37	-1.78±0.03	-17.26±0.08	2.79±0.27	Round2
NCGC00164563-06	-26.21±0.36	-24.77±0.25	39.20±0.75	-2.12±0.04	-16.75±0.08	2.85±0.54	Round2
NCGC00167553-02	-20.25±0.35	-24.49±0.77	37.22±0.63	-1.58±0.01	-16.52±0.04	7.42±0.73	Round2
NCGC00179612-03	-28.58±0.76	-38.78±2.93	58.43±3.20	-2.86±0.03	-18.85±0.25	7.06±0.88	Round2
NCGC00181743-02	-36.66±1.03	-26.76±0.65	50.86±2.00	-3.70±0.10	-20.70±0.22	4.45±1.40	Round2
NCGC00345789-05	-52.20±0.78	-10.47±0.66	43.56±1.25	-5.24±0.10	-23.08±0.24	-1.27±0.39	Round2
NCGC00386235-04	-27.27±0.34	-11.00±1.60	25.22±1.76	-2.35±0.03	-17.06±0.08	1.67±0.52	Round2
NCGC00386235-06	-40.77±0.79	-6.68±0.30	30.45±0.68	-3.78±0.06	-20.28±0.24	-0.51±0.22	Round2
NCGC00387803-01	-36.85±0.57	-25.72±0.91	53.85±0.82	-3.69±0.02	-20.17±0.06	7.76±0.36	Round2
NCGC00599627-01	-32.72±0.47	-35.51±2.61	59.37±2.40	-3.13±0.02	-18.65±0.00	6.67±0.41	Round2
NCGC00017331-08	-17.46±0.71	-21.16±0.51	32.16±0.36	-1.39±0.08	-14.86±0.10	7.02±0.35	Round3
NCGC00018117-17	-20.52±0.19	-17.76±0.20	28.62±0.29	-1.12±0.01	-15.61±0.03	4.82±0.36	Round3
NCGC00021202-03	-39.29±0.97	-54.75±2.15	76.62±1.99	-2.91±0.02	-22.38±0.04	2.06±0.87	Round3
NCGC00160628-03	-29.40±0.71	-23.59±1.65	42.63±1.36	-2.35±0.02	-16.92±0.11	4.20±1.02	Round3
NCGC00164563-04	-24.13±0.12	-49.04±1.54	54.83±1.12	-1.93±0.01	-17.56±0.05	-2.71±0.92	Round3
NCGC00164563-06	-25.38±0.35	-31.53±1.54	44.02±0.71	-1.74±0.02	-16.26±0.13	1.63±0.69	Round3
NCGC00167553-02	-4.55±0.41	-4.41±1.77	7.21±1.84	0.15±0.07	-11.71±0.22	10.12±0.49	Round3
NCGC00179612-03	-28.24±0.65	-49.85±1.38	71.41±1.15	-2.96±0.05	-18.96±0.13	9.32±0.42	Round3
NCGC00181743-02	-48.44±0.04	-39.39±1.26	68.16±0.87	-4.45±0.03	-22.92±0.15	-1.20±0.30	Round3
NCGC00345789-05	-58.30±0.96	-17.09±0.52	60.99±0.83	-5.15±0.05	-23.53±0.20	3.99±0.61	Round3
NCGC00386235-04	-37.82±0.40	-9.30±0.91	35.83±0.64	-3.30±0.05	-19.34±0.16	4.75±0.51	Round3
NCGC00386235-06	-11.21±0.67	-5.51±0.99	12.60±0.56	-0.45±0.02	-13.28±0.13	8.70±0.13	Round3
NCGC00387803-01	-49.27±0.83	-37.90±1.76	69.18±1.37	-4.77±0.08	-23.48±0.30	0.72±0.42	Round3
NCGC00599627-01	-44.17±0.20	-90.67±5.62	120.61±5.01	-4.14±0.05	-23.45±0.37	5.09±0.67	Round3
NCGC00021202-03	-12.96±0.19	-17.69±3.01	23.16±2.44	-0.64±0.05	-14.07±0.12	5.94±0.64	Round4
NCGC00179612-03	-16.71±0.39	-16.53±0.64	27.52±0.31	-1.20±0.01	-14.94±0.03	8.02±0.27	Round4
NCGC00345789-05	-49.04±0.23	-27.74±0.44	51.86±0.59	-4.83±0.02	-22.55±0.05	-7.21±0.30	Round4
NCGC00386235-06	-13.09±0.64	-1.74±0.26	7.73±0.02	-0.77±0.07	-13.50±0.18	5.63±0.58	Round4
