# Supplementary material for: A multiple-step in silico screening protocol to identify allosteric inhibitors of Spike–hACE2 binding
Source: Royal Society of Chemistry journal article supplement (doi:10.1039/d1cp04736a), 2022-01-01
Supplement: d1cp04736a7.xlsx [file d1cp04736a7.xlsx]

## Sheet: Table S6
LIGAND_ID	ΔEvdw	ΔEele	ΔGsol-p	ΔGsol-np	TΔS	MMPBSA
N1_Round1	-98.13±0.29	-609.02±1.44	668.20±1.65	-10.80±0.01	-34.89±0.07	-14.86±0.53
N1_Round2	-84.32±0.08	-590.96±0.64	648.27±0.72	-9.51±0.01	-30.12±NA	-6.39±0.16
N1_Round3	-95.60±0.18	-673.27±0.30	729.47±0.31	-10.76±0.02	-34.82±0.08	-15.33±0.46
N1_Round4	-99.74±0.03	-587.78±0.26	654.05±0.24	-10.79±0.01	-35.20±0.05	-9.05±0.38
N1_Round5	-101.45±0.38	-612.69±1.28	675.00±1.86	-10.81±0.04	-35.59±0.12	-14.37±0.33
N1_Round6	-92.52±0.12	-561.33±0.63	621.19±0.75	-10.17±0.02	-32.53±0.03	-10.30±0.10
N2_Round1	-85.67±0.37	-560.95±1.40	612.63±1.69	-9.62±0.00	-31.05±0.09	-12.55±0.14
N2_Round2	-92.10±0.20	-637.80±0.77	690.54±1.11	-10.27±0.02	-32.88±0.06	-16.75±1.01
N2_Round3	-102.48±0.19	-562.38±0.99	623.53±1.00	-11.42±0.01	-35.06±0.08	-17.69±0.16
N2_Round4	-100.09±0.41	-583.05±1.94	644.53±2.42	-11.35±0.03	-35.17±0.11	-14.80±0.17
N2_Round5	-89.85±0.18	-599.96±0.52	650.10±1.05	-9.91±0.02	-31.84±0.06	-17.79±0.45
N2_Round6	-98.64±0.13	-613.16±1.18	670.80±1.42	-11.87±0.02	-35.06±0.06	-17.82±0.29
N3_Round1	-101.89±0.60	-549.79±2.46	602.82±2.52	-10.85±0.02	-34.63±0.05	-25.07±0.14
N3_Round2	-102.23±0.21	-665.90±0.84	723.11±0.25	-10.85±0.02	-35.92±0.04	-19.95±0.77
N3_Round3	-91.97±0.23	-631.63±1.28	683.07±1.40	-10.49±0.05	-32.96±0.14	-18.06±0.41
N3_Round4	-96.48±0.53	-592.25±0.49	651.04±0.52	-10.63±0.01	-34.16±0.07	-14.16±0.28
N3_Round5	-103.79±0.40	-628.47±1.94	688.41±1.80	-11.20±0.05	-35.63±0.10	-19.42±0.15
N3_Round6	-93.63±0.40	-571.59±1.72	627.04±1.07	-10.06±0.00	-33.28±0.05	-14.96±0.51
N4_Round1	-95.51±0.16	-587.91±1.19	642.07±1.04	-10.22±0.03	-33.20±0.14	-18.37±0.31
N4_Round2	-99.13±0.26	-633.85±0.84	698.36±0.48	-10.92±0.00	-34.58±0.03	-10.96±0.45
N4_Round3	-93.91±0.15	-600.58±0.90	655.69±0.90	-10.93±0.02	-33.96±0.03	-15.77±0.32
N4_Round4	-86.07±0.13	-606.39±0.95	662.40±0.71	-9.79±0.00	-30.03±0.05	-9.83±0.34
N4_Round5	-96.12±0.32	-678.69±1.65	729.13±1.92	-10.95±0.04	-35.40±0.08	-21.22±0.21
N4_Round6	-90.27±0.21	-538.66±0.60	597.06±0.36	-10.21±0.01	-31.88±0.01	-10.20±0.22
N5_Round1	-96.33±0.36	-601.02±0.38	656.16±0.60	-10.90±0.01	-34.62±0.08	-17.46±0.43
N5_Round2	-100.23±0.25	-622.19±0.53	680.97±0.24	-11.03±0.01	-36.05±0.06	-16.43±0.12
N5_Round3	-90.24±0.12	-570.89±1.07	629.41±1.11	-10.38±0.01	-30.95±0.04	-11.15±0.22
N5_Round4	-95.34±0.12	-564.09±1.39	624.35±1.28	-10.69±0.02	-33.31±0.05	-12.46±0.30
N5_Round5	-90.91±0.06	-556.82±1.12	609.01±0.89	-10.15±0.01	-32.59±0.06	-16.28±0.38
N5_Round6	-91.08±0.43	-580.43±0.96	637.19±0.95	-10.37±0.03	-31.22±0.11	-13.48±0.30
N6_Round1	-85.41±0.14	-595.44±0.84	641.73±1.07	-9.60±0.02	-30.85±0.14	-17.87±0.23
N6_Round2	-90.25±0.08	-708.13±0.47	744.56±1.03	-9.89±0.01	-35.23±0.03	-28.47±0.67
N6_Round3	-85.06±0.29	-584.60±1.13	633.88±0.92	-9.51±0.02	-30.42±0.10	-14.87±0.49
N6_Round4	-97.67±0.23	-608.29±1.71	660.59±1.81	-11.16±0.02	-34.37±0.09	-22.17±0.37
N6_Round5	-83.06±0.35	-607.57±1.02	662.58±0.94	-9.30±0.03	-29.65±0.05	-7.70±0.49
N6_Round6	-94.66±0.11	-567.33±1.42	627.60±1.45	-10.31±0.00	-32.38±0.06	-12.33±0.05
N7_Round1	-96.64±0.21	-621.05±1.35	686.85±1.49	-10.83±0.02	-34.13±0.12	-7.54±0.08
N7_Round2	-95.56±0.13	-605.10±1.11	657.16±1.11	-10.34±0.02	-34.09±0.07	-19.75±0.09
N7_Round3	-95.46±0.26	-630.49±1.68	683.18±1.54	-10.44±0.01	-33.45±0.02	-19.76±0.44
N7_Round4	-90.99±0.18	-493.80±0.88	552.23±0.66	-9.60±0.00	-31.29±0.02	-10.87±0.57
N7_Round5	-93.10±0.10	-573.83±1.85	636.31±1.45	-10.46±0.01	-32.55±0.12	-8.53±0.45
N7_Round6	-96.39±0.35	-546.18±0.69	602.63±0.52	-10.22±0.02	-33.24±0.15	-16.93±0.60
