# Supplementary material for: A multiple-step in silico screening protocol to identify allosteric inhibitors of Spike–hACE2 binding
Source: Royal Society of Chemistry journal article supplement (doi:10.1039/d1cp04736a), 2022-01-01
Supplement: d1cp04736a8.xlsx [file d1cp04736a8.xlsx]

## Sheet: Table S7
Title	docking score
20777-72-4	-9.757
1426855-10-8	-9.622
1637815-93-0	-9.231
151345-35-6	-9.099
1426855-08-4	-9.099
1312805-81-4	-8.813
78101-73-2	-8.79
122931-60-6	-8.723
75350-60-6	-8.667
1803330-64-4	-8.653
7523-4-8	-8.63
1883329-04-1	-8.612
1002334-80-6	-8.575
217807-10-8	-8.57
14350-38-0	-8.547
791522-42-4	-8.505
217807-06-2	-8.48
179602-70-1	-8.466
103242-83-7	-8.386
688007-87-6	-8.381
158703-48-1	-8.376
217807-12-0	-8.351
1426855-06-2	-8.342
68892-47-7	-8.321
1246392-09-5	-8.316
1637815-91-8	-8.301
2099-88-9	-8.277
17039-11-1	-8.257
1259403-50-3	-8.253
162754-90-7	-8.248
786633-85-0	-8.236
217807-14-2	-8.235
1415665-49-4	-8.175
181362-85-6	-8.151
2253655-98-8	-8.129
165967-23-7	-8.105
190141-44-7	-8.102
190649-40-2	-8.1
2097455-49-5	-8.097
1053055-78-9	-8.094
2232135-01-0	-8.079
139701-83-0	-8.048
2170695-92-6	-8.02
2170695-90-4	-8.015
1002334-83-9	-8.009
1192538-65-0	-8.002
1422459-57-1	-7.99
2254342-06-6	-7.987
1426855-12-0	-7.98
65402-62-2	-7.972
119447-23-3	-7.971
133261-55-9	-7.953
1258520-12-5	-7.941
217807-08-4	-7.936
217807-11-9	-7.921
1135818-17-5	-7.92
1883329-09-6	-7.898
1445874-20-3	-7.895
732182-31-9	-7.881
184490-02-6	-7.878
2001001-61-0	-7.876
1883329-13-2	-7.873
10527-46-5	-7.869
1349128-86-4	-7.861
1005515-65-0	-7.86
6674-45-9	-7.833
1229574-76-8	-7.821
148503-84-8	-7.817
1493431-19-8	-7.81
1187471-21-1	-7.803
1348154-98-2	-7.8
1610779-10-6	-7.795
10527-47-6	-7.795
126934-30-3	-7.795
732182-28-4	-7.795
1053055-44-9	-7.785
743478-75-3	-7.772
190141-46-9	-7.768
1236406-79-3	-7.764
1051461-74-5	-7.758
1638370-27-0	-7.741
1648895-71-9	-7.73
20137-01-3	-7.726
1639870-99-7	-7.717
178809-73-9	-7.702
117-68-0	-7.694
66882-40-4	-7.694
71856-42-3	-7.694
2232135-12-3	-7.692
179952-06-8	-7.687
741664-40-4	-7.686
79198-91-7	-7.684
133947-44-1	-7.678
179952-07-9	-7.674
167699-62-9	-7.672
1075686-93-9	-7.662
2205099-98-3	-7.657
1826078-93-6	-7.655
1469338-29-1	-7.654
2024571-98-8	-7.653
169322-01-4	-7.652
1002334-82-8	-7.65
13005-02-2	-7.648
107747-73-9	-7.633
158614-79-0	-7.623
1383925-94-7	-7.619
1236406-80-6	-7.602
1883329-03-0	-7.592
2144805-10-5	-7.587
6554-00-3	-7.586
10108-97-1	-7.585
2232135-45-2	-7.583
1004318-65-3	-7.573
1397716-29-8	-7.572
159067-92-2	-7.571
1187644-82-1	-7.57
183796-09-0	-7.57
133261-56-0	-7.57
1349190-95-9	-7.567
124705-10-8	-7.559
1690318-94-5	-7.557
2249800-90-4	-7.555
70020-89-2	-7.553
1052236-37-9	-7.544
1416910-82-1	-7.54
774118-52-4	-7.538
728853-54-1	-7.537
771411-83-7	-7.537
1061160-24-4	-7.524
1383925-90-3	-7.523
188560-02-3	-7.522
13912-93-1	-7.511
2101204-01-5	-7.51
1206836-80-7	-7.495
2102103-55-7	-7.49
1236408-25-5	-7.485
2097025-39-1	-7.483
2274737-66-3	-7.473
158614-82-5	-7.471
22630-39-3	-7.471
2253656-38-9	-7.467
1002334-94-2	-7.466
1052236-38-0	-7.462
214480-93-0	-7.462
132-34-3	-7.457
1383925-97-0	-7.453
1105693-49-9	-7.442
161056-99-1	-7.436
214775-67-4	-7.436
1962114-92-6	-7.43
2097455-12-2	-7.427
756754-26-4	-7.424
157695-29-9	-7.423
1613529-52-4	-7.423
676521-29-2	-7.422
1187644-89-8	-7.422
68892-45-5	-7.42
2245840-05-3	-7.42
1493431-16-5	-7.408
156854-55-6	-7.406
740057-94-7	-7.405
177746-64-4	-7.405
1002334-79-3	-7.4
1310799-56-4	-7.395
1513874-51-5	-7.392
784151-35-5	-7.387
DB00720	-7.384
1187644-68-3	-7.375
1610779-11-7	-7.372
1187644-60-5	-7.357
2101310-96-5	-7.356
1610779-08-2	-7.353
1346804-71-4	-7.351
230956-10-2	-7.346
1445905-50-9	-7.344
2226206-24-0	-7.336
190141-42-5	-7.332
1523571-59-6	-7.326
21089-32-7	-7.326
2097025-35-7	-7.325
217807-07-3	-7.323
133386-22-8	-7.321
1253736-62-7	-7.319
183541-58-4	-7.316
1190064-46-0	-7.316
1187644-73-0	-7.315
1638370-28-1	-7.314
1217503-36-0	-7.314
1425582-06-4	-7.313
176713-60-3	-7.312
10566-04-8	-7.309
180075-13-2	-7.3
182759-83-7	-7.299
170784-58-4	-7.299
187340-31-4	-7.298
1310799-60-0	-7.296
117269-79-1	-7.294
68973-47-7	-7.293
73491-85-7	-7.293
195863-72-0	-7.293
