# Supplementary material for: A multiple-step in silico screening protocol to identify allosteric inhibitors of Spike–hACE2 binding
Source: Royal Society of Chemistry journal article supplement (doi:10.1039/d1cp04736a), 2022-01-01
Supplement: d1cp04736a9.xlsx [file d1cp04736a9.xlsx]

## Sheet: Table S8
Title	docking score
1053055-78-9	-9.191
179602-70-1	-8.987
1002334-80-6	-8.956
1637815-91-8	-8.875
217807-14-2	-8.848
2170457-36-8	-8.722
217807-13-1	-8.704
217807-11-9	-8.644
1053055-44-9	-8.608
124705-10-8	-8.546
22630-36-0	-8.513
1445874-20-3	-8.504
1023756-44-6	-8.501
188560-02-3	-8.479
217807-08-4	-8.476
103242-83-7	-8.469
1422459-57-1	-8.447
2001001-59-6	-8.412
2004706-85-6	-8.407
190141-44-7	-8.402
162754-90-7	-8.395
2001001-61-0	-8.361
70020-89-2	-8.262
71206-93-4	-8.255
1061160-24-4	-8.232
10527-46-5	-8.22
1807796-52-6	-8.219
126934-30-3	-8.218
133261-56-0	-8.208
1493431-19-8	-8.208
780739-68-6	-8.203
2254342-06-6	-8.178
217807-09-5	-8.147
1469975-49-2	-8.142
2244178-06-9	-8.133
211448-88-3	-8.116
68892-47-7	-8.083
148503-84-8	-8.082
133261-55-9	-8.081
1445905-50-9	-8.035
7523-4-8	-8.019
149297-82-5	-8.004
1222448-18-1	-8.001
1445947-74-9	-7.958
78101-73-2	-7.947
1422459-54-8	-7.945
1637815-93-0	-7.938
2095166-68-8	-7.934
1391853-62-5	-7.904
2024571-97-7	-7.889
1609273-15-5	-7.876
1376625-65-8	-7.86
111964-43-3	-7.837
1883329-04-1	-7.823
123156-34-3	-7.799
2086333-33-5	-7.791
1187644-68-3	-7.789
158614-79-0	-7.789
1206836-80-7	-7.767
2170695-89-1	-7.763
20137-01-3	-7.749
1469975-50-5	-7.741
107021-21-6	-7.741
2170457-35-7	-7.737
1268669-59-5	-7.733
1199617-97-4	-7.719
166022-38-4	-7.699
77286-59-0	-7.696
2105903-85-1	-7.691
127757-63-5	-7.684
175923-15-6	-7.665
1002334-94-2	-7.665
2244178-08-1	-7.664
2143598-95-0	-7.649
1258522-17-6	-7.64
217807-12-0	-7.636
22630-39-3	-7.631
214775-63-0	-7.621
1334426-53-7	-7.619
1333745-25-7	-7.606
757150-06-4	-7.592
15106-27-1	-7.591
2193066-17-8	-7.577
2001001-63-2	-7.571
1883329-09-6	-7.57
214480-94-1	-7.564
1493431-16-5	-7.554
165967-23-7	-7.551
217807-07-3	-7.548
1584672-76-3	-7.527
1222189-78-7	-7.525
115196-76-4	-7.521
165822-71-9	-7.517
7600-31-9	-7.516
1883329-08-5	-7.492
107811-61-0	-7.49
2244178-04-7	-7.487
1187644-70-7	-7.486
2141967-42-0	-7.476
2193066-15-6	-7.475
206445-74-1	-7.474
127853-33-2	-7.468
166403-67-4	-7.463
vidarabine_sodium_phosphate	-7.46
DB00646	-7.442
1054617-30-9	-7.441
78101-82-3	-7.439
1987876-49-2	-7.431
1821044-13-6	-7.431
1374997-73-5	-7.429
181362-85-6	-7.408
132417-92-6	-7.407
1155824-52-4	-7.403
214480-95-2	-7.401
79848-02-5	-7.4
1346891-02-8	-7.4
123156-40-1	-7.394
1145718-81-5	-7.391
144489-45-2	-7.391
68892-48-8	-7.391
2130068-77-6	-7.386
73494-99-2	-7.382
217807-10-8	-7.378
211037-53-5	-7.378
147127-20-6	-7.372
114438-36-7	-7.363
1002334-85-1	-7.36
7182-71-0	-7.349
1254203-56-9	-7.348
1312805-81-4	-7.342
1053-73-2	-7.338
120811-29-2	-7.338
120811-30-5	-7.338
172293-60-6	-7.338
1352918-35-4	-7.334
1610375-52-4	-7.333
2307197-45-9	-7.326
220166-80-3	-7.318
1187644-25-2	-7.316
1376625-77-2	-7.31
779312-10-6	-7.309
101830-24-4	-7.304
1261254-23-2	-7.301
145899-77-0	-7.298
1373244-11-1	-7.297
1610779-06-0	-7.294
2133373-66-5	-7.292
182415-40-3	-7.289
2088572-78-3	-7.289
71186-86-2	-7.288
1863084-44-9	-7.288
1048382-26-8	-7.283
10527-47-6	-7.277
23197-98-0	-7.275
DB00884	-7.274
113296-27-8	-7.274
214121-97-8	-7.27
1777812-93-7	-7.269
2316643-49-7	-7.263
688007-87-6	-7.262
178988-81-3	-7.255
1383925-90-3	-7.247
1171006-66-8	-7.246
2131834-70-1	-7.234
1048382-22-4	-7.234
68892-45-5	-7.234
66267-72-9	-7.234
1027908-28-6	-7.234
1618656-18-0	-7.232
228874-52-0	-7.231
7561-54-8	-7.231
123156-35-4	-7.23
115226-06-7	-7.225
175923-21-4	-7.22
2245840-05-3	-7.209
169514-95-8	-7.205
1187644-59-2	-7.205
118553-09-6	-7.201
214480-96-3	-7.199
115226-07-8	-7.197
1333745-09-7	-7.195
1912438-42-6	-7.192
21138-49-8	-7.192
148873-59-0	-7.191
1622876-63-4	-7.185
75795-17-4	-7.184
1038983-64-0	-7.181
186640-86-8	-7.181
1349519-64-7	-7.18
157695-29-9	-7.174
79726-02-6	-7.165
1258521-58-2	-7.163
192625-71-1	-7.163
1372591-86-0	-7.162
71783-25-0	-7.158
1615696-63-3	-7.158
156750-72-0	-7.156
1312805-80-3	-7.156
1690318-79-6	-7.153
220437-14-9	-7.152
