# Supplementary material for: A multiple-step in silico screening protocol to identify allosteric inhibitors of Spike–hACE2 binding
Source: Royal Society of Chemistry journal article supplement (doi:10.1039/d1cp04736a), 2022-01-01
Supplement: d1cp04736a10.xlsx [file d1cp04736a10.xlsx]

## Sheet: Sheet1
LIGAND_ID	ΔEvdw	ΔEele	ΔGsol-p	ΔGsol-np	TΔS	MMPBSA	Round
1002334-80-6	-30.40±0.83	-72.11±1.60	93.01±0.28	-2.88±0.05	-18.77±0.15	6.38±1.01	Round1
1002334-83-9	-44.58±0.57	-59.87±3.05	89.04±2.51	-4.20±0.06	-22.31±0.16	2.71±1.07	Round1
1246392-09-5	-37.97±0.75	-56.44±2.39	73.58±2.32	-3.65±0.06	-20.19±0.18	-4.29±0.26	Round1
1415665-49-4	-35.97±0.46	-46.46±2.34	67.82±1.95	-2.93±0.03	-19.99±0.09	2.44±0.06	Round1
1426855-06-2	-35.92±0.62	-62.19±4.00	87.81±2.95	-3.93±0.06	-20.75±0.18	6.52±0.84	Round1
1426855-08-4	-56.71±0.21	-50.37±2.95	87.57±1.06	-5.58±0.05	-25.14±0.15	0.05±1.85	Round1
1426855-10-8	-75.45±1.04	-53.28±0.59	89.99±1.28	-6.99±0.05	-29.62±0.13	-16.10±0.95	Round1
14350-38-0	-50.55±0.38	-27.03±3.27	52.74±2.74	-5.22±0.08	-23.72±0.12	-6.35±0.86	Round1
158703-48-1	-35.69±0.47	-31.57±1.19	51.00±0.89	-2.93±0.02	-18.11±0.05	-1.09±0.19	Round1
165967-23-7	-31.08±0.81	-21.90±1.58	40.14±0.90	-2.74±0.08	-17.92±0.27	2.34±1.55	Round1
190649-40-2	-25.35±0.27	-15.29±0.88	26.11±1.01	-2.17±0.03	-17.19±0.04	0.49±0.46	Round1
2232135-01-0	-36.73±0.43	-21.28±0.38	45.75±1.14	-3.06±0.01	-19.22±0.13	3.90±1.14	Round1
75350-60-6	-46.54±0.84	-73.24±3.29	99.32±3.07	-4.37±0.02	-21.45±0.14	-3.38±0.84	Round1
Atazanavir	-13.79±0.12	-6.37±0.32	15.41±0.48	-0.80±0.07	-13.90±0.05	8.36±0.66	Round1
BDE_33183994	-19.75±0.16	-7.26±2.05	17.07±1.89	-1.28±0.01	-14.63±0.07	3.40±0.52	Round1
BDH_34000012	-28.99±0.21	-16.53±1.60	29.95±1.36	-2.15±0.02	-17.25±0.02	-0.47±0.39	Round1
DB00646	-23.92±0.23	-27.78±0.52	40.11±0.33	-2.00±0.05	-17.17±0.11	3.58±0.45	Round1
DB00759	-4.81±0.09	-4.23±0.26	5.81±0.30	0.18±0.02	-11.75±0.01	8.70±0.42	Round1
1192538-65-0	-39.86±0.46	-36.20±0.74	61.44±1.26	-3.96±0.02	-20.99±0.21	2.41±0.60	Round1
narlaprevir	-23.27±0.93	-25.17±2.36	41.12±2.48	-1.67±0.12	-17.11±0.21	8.13±0.86	Round1
Neomycin_sulfate	-23.10±0.94	-32.56±1.62	50.37±2.19	-2.07±0.11	-17.22±0.34	9.87±0.96	Round1
Ritonavir	-32.83±0.99	-6.01±1.65	22.47±1.50	-3.06±0.09	-18.63±0.25	-0.80±0.85	Round1
SC-52151	-28.38±0.31	-29.82±1.74	47.73±1.53	-2.49±0.06	-17.86±0.24	4.90±0.68	Round1
TJ-14	-21.64±0.57	-46.25±1.92	53.38±1.27	-1.93±0.02	-16.98±0.11	0.55±0.19	Round1
20777-72-4	-49.00±1.21	-21.12±0.56	51.58±2.06	-4.81±0.12	-23.48±0.45	0.12±0.83	Round1
1002334-80-6	-61.02±0.39	-93.39±3.21	140.15±1.66	-5.42±0.01	-27.13±0.04	7.45±1.17	Round2
1002334-83-9	-37.13±1.03	-47.68±2.39	67.85±0.92	-3.16±0.06	-20.35±0.32	0.23±0.87	Round2
1246392-09-5	-39.39±1.05	-63.04±0.72	76.73±1.81	-3.35±0.04	-21.20±0.15	-7.85±1.21	Round2
1415665-49-4	-41.45±0.10	-44.44±1.67	67.09±0.88	-2.78±0.05	-21.02±0.12	-0.56±0.93	Round2
1426855-06-2	-50.46±0.24	-70.08±1.39	93.40±1.40	-4.58±0.06	-24.57±0.17	-7.14±0.76	Round2
1426855-08-4	-60.65±0.51	-52.85±3.52	88.94±2.49	-5.56±0.05	-25.93±0.13	-4.19±1.42	Round2
1426855-10-8	-59.78±0.54	-77.97±1.95	106.22±1.48	-6.59±0.04	-27.93±0.28	-10.18±0.85	Round2
14350-38-0	-49.05±0.05	-23.68±2.47	47.33±2.38	-4.47±0.07	-22.26±0.14	-7.61±1.06	Round2
158703-48-1	-49.31±1.08	-48.10±2.26	75.02±2.39	-4.16±0.03	-22.33±0.16	-4.22±0.49	Round2
165967-23-7	-23.59±1.16	-28.86±2.01	52.58±3.77	-1.93±0.09	-15.95±0.23	14.16±1.29	Round2
190649-40-2	-28.19±1.15	-45.71±3.94	62.22±3.48	-2.95±0.09	-18.35±0.27	3.72±0.92	Round2
2232135-01-0	-26.38±0.50	-21.20±0.94	34.62±0.38	-2.36±0.03	-17.22±0.03	1.91±0.27	Round2
75350-60-6	-44.01±0.26	-64.70±1.80	91.19±0.90	-4.27±0.02	-22.37±0.15	0.57±1.03	Round2
Atazanavir	-47.35±1.02	-45.41±1.71	73.51±1.17	-4.32±0.02	-24.34±0.13	0.78±0.52	Round2
BDE_33183994	-22.65±0.75	-27.76±0.18	40.05±0.91	-1.78±0.03	-15.93±0.12	3.79±0.48	Round2
BDH_34000012	-19.49±1.42	-19.62±0.98	32.36±1.11	-1.45±0.11	-15.33±0.30	7.14±0.76	Round2
DB00646	-36.90±0.57	-26.62±0.88	49.71±0.11	-4.27±0.05	-21.46±0.16	3.39±0.28	Round2
DB00759	-27.50±0.45	-3.30±1.19	32.89±1.42	-1.93±0.03	-16.82±0.07	16.99±1.86	Round2
1192538-65-0	-25.47±1.41	-46.87±1.18	60.94±0.18	-2.54±0.05	-18.11±0.17	4.17±0.38	Round2
narlaprevir	-23.40±0.89	-22.94±2.07	34.60±2.67	-2.08±0.08	-16.74±0.33	2.91±0.25	Round2
Neomycin_sulfate	-31.24±0.73	-67.71±0.92	80.35±0.98	-2.87±0.05	-20.65±0.17	-0.83±0.51	Round2
Ritonavir	-33.66±0.50	-14.38±1.08	32.43±0.91	-2.89±0.06	-18.88±0.13	0.38±0.43	Round2
SC-52151	-40.09±0.49	-51.60±0.55	77.79±1.42	-3.18±0.02	-21.15±0.06	4.07±0.55	Round2
TJ-14	-30.66±0.48	-72.09±1.92	87.75±1.82	-2.79±0.02	-19.39±0.09	1.61±0.73	Round2
20777-72-4	-56.44±0.64	-42.21±0.64	69.29±0.40	-5.46±0.05	-25.24±0.03	-9.58±0.29	Round2
1002334-80-6	-29.73±0.32	-22.59±0.38	39.59±1.43	-2.40±0.06	-17.83±0.06	2.70±0.74	Round3
1426855-06-2	-50.42±0.77	-56.38±1.16	76.76±0.95	-4.62±0.02	-24.45±0.03	-10.22±0.49	Round3
14350-38-0	-49.05±0.05	-23.68±2.47	47.33±2.38	-4.47±0.07	-22.26±0.14	-7.61±1.06	Round3
1246392-09-5	-32.06±0.53	-30.29±2.42	47.32±2.28	-2.87±0.01	-19.07±0.16	1.17±0.58	Round3
1426855-10-8	-64.85±0.41	-70.93±1.57	103.17±1.44	-6.66±0.06	-28.69±0.17	-10.59±0.45	Round3
20777-72-4	-41.31±0.66	-10.42±0.21	33.13±0.54	-3.67±0.08	-19.44±0.15	-2.82±0.14	Round3
1002334-80-6	-31.01±0.51	-59.09±2.17	77.89±2.65	-2.71±0.04	-18.37±0.15	3.46±1.29	Round4
1426855-06-2	-28.16±0.86	-24.96±0.98	40.06±0.32	-2.57±0.11	-17.70±0.07	2.07±0.79	Round4
14350-38-0	-39.88±0.21	-96.27±0.90	94.64±1.18	-3.66±0.05	-22.09±0.22	-23.08±0.29	Round4
1246392-09-5	-54.60±0.70	-72.94±2.17	102.07±1.66	-5.07±0.07	-25.75±0.07	-4.79±1.83	Round4
1426855-10-8	-58.83±0.50	-58.68±0.76	80.61±0.52	-5.05±0.05	-25.64±0.09	-16.31±0.68	Round4
20777-72-4	-56.44±0.64	-42.21±0.64	69.29±0.40	-5.46±0.05	-25.24±0.03	-9.58±0.29	Round4
1002334-80-6	-12.20±0.78	-29.84±0.75	37.78±0.33	-0.61±0.06	-13.95±0.15	9.07±0.36	Round5
1426855-06-2	-41.20±0.37	-44.23±1.27	65.03±0.75	-4.25±0.05	-21.06±0.22	-3.60±1.53	Round5
14350-38-0	-38.64±0.54	-22.20±1.29	38.48±1.60	-3.31±0.06	-20.08±0.22	-5.59±0.84	Round5
1246392-09-5	-28.38±0.52	-17.77±1.05	33.41±0.70	-2.22±0.04	-17.11±0.06	2.16±0.60	Round5
1426855-10-8	-50.49±1.06	-42.35±1.80	66.19±0.92	-5.15±0.07	-24.53±0.19	-7.27±1.02	Round5
20777-72-4	-61.64±1.07	-26.85±0.60	58.75±1.25	-5.93±0.02	-26.63±0.24	-9.04±0.13	Round5
